Trinh *et al.* main text and figure legends

1 **Myeloid lncRNA *LOUP* Mediates Opposing Regulatory Effects of RUNX1 and RUNX1-ETO in**  
2 **t(8;21) AML**

3 Bon Q. Trinh<sup>1§</sup>, Simone Ummarino<sup>1</sup>, Alexander K. Ebralidze<sup>1</sup>, Emiel van der Kouwe<sup>8</sup>, Mahmoud A.  
4 Bassal<sup>1,3</sup>, Tuan M. Nguyen<sup>1</sup>, Rory Coffey<sup>1</sup>, Danielle E. Tenen<sup>2</sup>, Emiliano Fabiani<sup>9</sup>, Carmelo Gurnari<sup>9</sup>,  
5 Chan-Shuo Wu<sup>3</sup>, Vladimir Espinosa Angarica<sup>3</sup>, Yanzhou Zhang<sup>1</sup>, Li Ying<sup>3</sup>, Henry Yang<sup>3</sup>, Gerwin Heller<sup>8</sup>,  
6 Sisi Chen<sup>1</sup>, Hong Zhang<sup>1</sup>, Abby R. Thurm<sup>4,5</sup>, Francisco Marchi<sup>4,6</sup>, Elena Levantini<sup>1,4,7</sup>, Philipp B. Staber<sup>8</sup>,  
7 Pu Zhang<sup>1</sup>, Maria Teresa Voso<sup>9</sup>, Pier Paolo Pandolfi<sup>1</sup>, Annalisa Di Ruscio<sup>1,10</sup>, and Daniel G. Tenen<sup>1,3,4§</sup>

8  
9 <sup>1</sup>Harvard Medical School Initiative for RNA Medicine, Harvard Medical School, Boston, MA, 02115,  
10 USA ;<sup>2</sup>Division of Endocrinology, Diabetes, and Metabolism, Beth Israel Deaconess Medical Center,  
11 Boston, MA, USA; <sup>3</sup>Cancer Science Institute, National University of Singapore, 117599, Singapore  
12 <sup>4</sup>Harvard Stem Cell Institute, Harvard Medical School, Boston, MA, 02115, USA; <sup>5</sup>University of  
13 California Los Angeles, CA, 90095, USA; <sup>6</sup>University of Florida, FL, 32611, USA; <sup>7</sup>Institute of  
14 Biomedical Technologies, National Research Council (CNR), Area della Ricerca di Pisa, Pisa, 56124,  
15 Italy; <sup>8</sup>Department of Medicine I, Division of Hematology, Medical University of Vienna, Vienna, Austria  
16 <sup>9</sup>University of Rome Tor Vergata, Roma, 00133, Italy; <sup>10</sup>University of Eastern Piedmont, Department of  
17 Translational Medicine, Novara, 28100, Italy

18  
19 <sup>§</sup>Corresponding Author and Lead Contact:

20 Daniel G. Tenen

21 [daniel.tenen@nus.edu.sg](mailto:daniel.tenen@nus.edu.sg)

22  
23 Bon Q. Trinh

24 [btrinh@bidmc.harvard.edu](mailto:btrinh@bidmc.harvard.edu)

25  
26 Word Count (Text): 3975

27 Word Count (Abstract): 186

28 Main Table Count: 0

29 Main Figure Count: 7

30 Reference Count: 59

31

32 **Scientific Category for Submission:** Myeloid Neoplasia, Granulocytes and Myelopoiesis

33

34

Trinh *et al.* main text and figure legends

## 35 KEY POINTS

- 36 • lncRNA *LOUP* coordinates with RUNX1 to induces *PU.1* long-range transcription, conferring  
37 myeloid differentiation and inhibiting cell growth.
- 38 • RUNX1-ETO limits chromatin accessibility at the *LOUP* locus, causing inhibition of *LOUP* and  
39 *PU.1* expression in t(8;21) AML.

## 41 KEYWORDS

42 Chromatin structure; enhancer; promoter; lncRNA; long-range transcription; single-cell sequencing; cell  
43 type-specific gene induction; transcription factor fusion; t(8;21) AML; myeloid differentiation

## 45 ABSTRACT

46 The mechanism underlying cell type-specific gene induction conferred by ubiquitous transcription  
47 factors as well as disruptions caused by their chimeric derivatives in leukemia is not well understood.  
48 Here we investigate whether RNAs coordinate with transcription factors to drive myeloid gene  
49 transcription. In an integrated genome-wide approach surveying for gene loci exhibiting concurrent  
50 RNA- and DNA-interactions with the broadly expressed transcription factor RUNX1, we identified the  
51 long noncoding RNA *LOUP*. This myeloid-specific and polyadenylated lncRNA induces myeloid  
52 differentiation and inhibits cell growth, acting as a transcriptional inducer of the myeloid master  
53 regulator *PU.1*. Mechanistically, *LOUP* recruits RUNX1 to both the *PU.1* enhancer and the promoter,  
54 leading to the formation of an active chromatin loop. In t(8;21) acute myeloid leukemia, wherein RUNX1  
55 is fused to ETO, the resulting oncogenic fusion protein RUNX1-ETO limits chromatin accessibility at the  
56 *LOUP* locus, causing inhibition of *LOUP* and *PU.1* expression. These findings highlight the important  
57 role of the interplay between cell type-specific RNAs and transcription factors as well as their oncogenic  
58 derivatives in modulating lineage-gene activation and raise the possibility that RNA regulators of  
59 transcription factors represent alternative targets for therapeutic development.

## 61 INTRODUCTION

62 Lineage-control genes that dictate cellular identities are often expressed in dynamic and  
63 hierarchical patterns.<sup>1-3</sup> Disturbance of these established normal patterns results in anomalies.<sup>4</sup> In the  
64 blood system, the ETS-family transcription factor PU.1 (also known as Spi-1) is essential for myeloid  
65 differentiation. *PU.1* is silent in most tissues and cell types but expressed at highest levels in myeloid  
66 cells including granulocytes and monocytes.<sup>5</sup> Downregulation of *PU.1* impairs myeloid cell  
67 differentiation leading to acute myeloid leukemia (AML).<sup>6,7</sup> *PU.1* is a major downstream transcriptional

Trinh *et al.* main text and figure legends

68 target of Runt-related transcription factor 1 (RUNX1) that is expressed in many different cell types and  
69 plays diverse biological roles in hematopoiesis, development of neurons, hair follicles, and skin.<sup>8-12</sup> In  
70 AML with t(8;21) chromosomal translocation, a portion of *RUNX1* containing the Runt DNA binding  
71 domain is fused to *ETO*, giving rise to the oncogenic transcription factor fusion RUNX1-ETO.<sup>13,14</sup>  
72 Previously, we have reported that RUNX1-ETO inhibits *PU.1* expression<sup>15</sup> but the mechanism  
73 underlying this transcriptional inhibition remains to be determined. In general, how broadly expressed  
74 transcription factors, such as RUNX1, modulate cell type- and gene-specific induction and how their  
75 chimeric derivatives disrupt this normal regulation in leukemia are poorly understood.

76  
77 Transcription of many cell type-specific genes are induced by enhancer elements, which are  
78 located at variable distances from gene targets.<sup>16,17</sup> For instance, *PU.1* transcription is induced by the  
79 formation of a specific chromatin loop resulting from the interaction between the upstream regulatory  
80 element (URE) (-17 kb in human and -14 kb in mouse) and the proximal promoter region (PrPr).<sup>18-20</sup>  
81 Interestingly, abrogation of RUNX1-binding motifs at the URE reduces URE-PrPr interaction, resulting  
82 in decreased *PU.1* expression in myeloid cells.<sup>8,15</sup> Because RUNX1 is broadly expressed, it remains  
83 unclear how this transcription factor modulates chromatin structure in such a gene- and cell type-  
84 specific manner.

85  
86 With advances in whole transcriptome sequencing over the last decade, thousands of noncoding  
87 RNAs (ncRNA) have been unveiled.<sup>21</sup> Arbitrarily defined as ncRNAs having at least 200 nucleotides in  
88 length, long noncoding RNAs (lncRNA) are implicated to display tissue-specific expression patterns<sup>22,23</sup>  
89 and might undergo post-transcriptional processing such as splicing and polyadenylation.<sup>24</sup> Through  
90 interactions with DNAs, proteins and other RNAs, lncRNAs regulate fundamental cellular processes  
91 including transcription, RNA stability, and DNA methylation.<sup>24-26</sup> To date, only a few lncRNAs have been  
92 precisely mapped and functionally defined,<sup>23</sup> leaving most lncRNAs poorly annotated and largely  
93 unexplored.

94  
95 In this study, we identified a myeloid-specific lncRNA termed “Long noncoding RNA Originating  
96 from the URE of P*U.1*”, or *LOUP*, from an integrated genome-wide approach aimed at screening for  
97 gene loci exhibiting concurrent RNA- and DNA-interactions with RUNX1. We demonstrated that *LOUP*  
98 induces *PU.1* expression, conferring myeloid differentiation, and inhibiting cell growth. *LOUP* serves as  
99 a central hub in opposing regulation by RUNX1 and its derived oncogenic fusion, RUNX1-ETO. Our  
100 findings provide a model explaining how a lineage gene is activated in normal myeloid development  
101 and dysregulated in leukemia.

102

Trinh *et al.* main text and figure legends

## 103 **METHODS**

### 104 **Cell lines and Cell Culture**

105 U937, HL-60, K562, HEK293T, RAW 264.7, NB4, Jurkat, Kasumi-1 and THP-1 cells were obtained  
106 from the American Type Culture Collection (ATCC). U937, HL-60, NB4, Jurkat, and K562 cells were  
107 cultured in full RPMI-1640 medium (supplemented with 10% (vol/vol) fetal bovine serum (FBS; Cellgro)  
108 and 1% penicillin-streptomycin). Kasumi-1 cells were cultured in the same medium plus 20% (vol/vol)  
109 FBS. THP-1 cells were cultured in full RPMI-1640 medium supplemented with 2-mercaptoethanol to a  
110 final concentration of 0.05 mM. HEK293T and RAW 264.7 cells were cultured in DMEM supplemented  
111 with 10% (vol/vol) FBS and 1% penicillin-streptomycin. All cells were grown at 37°C in 5% (vol/vol) CO<sub>2</sub>  
112 and humidified incubators.

113

### 114 **AML patient sample collection**

115 Bone Marrow (BM) samples were obtained from newly diagnosed AML patients at the Tor Vergata  
116 University Hospital, Rome with informed consent. Diagnoses were performed according to “The 2016  
117 revision to the World Health Organization classification of myeloid neoplasms and acute leukemia”.<sup>27</sup>  
118 Bone marrow mononuclear cells (BM-MNCs) were isolated by Ficoll gradient centrifugation using  
119 Lympholyte-H (Cedarlane), according to the manufacturer’s instructions.

120

121 Methods for assaying interactions of RNA, DNA, and protein with chromatin, chromatin structure and  
122 gene expression manipulation as well as bioinformatic analyses are in supplemental methods.

123

## 124 **RESULTS**

### 125 **Identification of RUNX1-interacting RNAs at myeloid gene loci**

126 We started out by performing a transcriptome-wide survey for RUNX1-interacting RNAs in the  
127 monocytic cell line THP-1 using formaldehyde RNA immunoprecipitation sequencing (RIP-seq).<sup>28,29</sup>  
128 RUNX1-interacting RNAs were captured by anti-RUNX1 antibody (Figures S1A-C) and sequenced by  
129 paired-end massively parallel sequencing. By annotating 14,067 high-confident RUNX1-RIP peaks to  
130 the GRCh38.p12 gene catalog,<sup>30</sup> we identified 5,774 gene loci carrying at least one of these peaks  
131 (Figure S1D, left). Most of the peaks were detected within transcript bodies and promoters (Figure  
132 S1E). To identify genes exhibiting concurrent RUNX1-RNA and RUNX1-DNA interactions, we  
133 annotated 24,132 high-confident RUNX1-ChIP peaks to the same gene catalog and identified 13,272  
134 corresponding gene loci (Figure S1D, right). The majority of these peaks were found at intronic,  
135 promoter, and intergenic regions (Figure S1F). Because most of peaks identified by both RUNX1-RIP  
136 and RUNX1-ChIP peaks were distributed at coding gene loci (Figures 1A-B), we focused our analyses

Trinh *et al.* main text and figure legends

137 on this gene group. By intersecting these genes with a list of 78 myeloid genes defined by their known  
138 roles in myeloid development, or myeloid molecular markers (Table S1), we obtained 15 myeloid gene  
139 loci displaying both RUNX1-RIP and RUNX1-ChIP peaks (Figure 1C). *PU.1*, a master regulator of  
140 myeloid development and a well-known transcriptional target of RUNX1,<sup>8</sup> was among these genes.  
141 Intriguingly, we observed RNA peaks at the upstream region of *PU.1* (Figure 1D). We further validated  
142 this observation by RUNX1 RIP-qPCR (Figure 1E). Additional myeloid genes showing RUNX1-RIP  
143 peaks and RUNX1-ChIP peaks are presented in Figure S1G. The presence of previously  
144 uncharacterized RNAs, arising from the upstream region of the *PU.1* locus, and able to interact with  
145 RUNX1, suggests their potential role in controlling *PU.1* expression through RUNX1-mediated  
146 transcriptional regulation.

147

### 148 **Characterization of the RUNX1-interacting lncRNA *LOUP***

149 To map the RUNX1-interacting transcript(s), we inspected the RNA expression and epigenetic  
150 landscape at the upstream region of the *PU.1* locus (Figure 2A). Remarkably, the RNA-seq track view  
151 revealed two distinct RNA peaks. A narrow peak was observed at the URE, which corresponded to an  
152 area of open chromatin in myeloid cells as indicated by strong DNase I hypersensitivity signals (Figure  
153 2A, DNase-seq). This element was also enriched with histone post-translational modifications such as  
154 H3K27ac, H3K4me1, and H3K4me3 (Figure 2A, ChIP-seq), which are typical features of active  
155 enhancers.<sup>31,32</sup> A broad peak was proximal to the promoter region. Notably, these peaks were present  
156 in myeloid cell lines (THP-1 and HL-60) and primary monocytes, but not in the lymphoid cell line Jurkat,  
157 which does not express *PU.1* mRNA, indicating a cell-type specific expression pattern. RT-PCR and  
158 Sanger sequencing analysis identified exon junctions connecting these two peaks in both human and  
159 murine cell lines (Figure S2A). Strand-specific RT-PCR analysis confirmed that the transcript is sense  
160 with respect to the *PU.1* gene (Figure 2B). To locate the 5' end, we inspected Cap analysis gene  
161 expression sequencing (CAGE-seq) tracks from the FANTOM5 project,<sup>33</sup> and identified a strong CAGE-  
162 seq peak, located within the URE and in the sense genomic orientation (Figure 2A, CAGE-seq),  
163 suggesting the presence of the 5' end of a transcript. Using the P5-linker ligation method outlined in  
164 Figure S2B, we identified the 5' end including a transcription start site (TSS) of the RNA within the  
165 homology region 1 (H1) of the URE<sup>18</sup> (Figure S2C). Although a splicing event was detected within the  
166 second exon, intron retention was dominant as shown by the presence of a ~2.3 Kb major transcript  
167 and a ~1.0 Kb minor transcript (Figures 2C and S2D). The transcripts were detectable in the myeloid  
168 cell line U937, but not in the lymphoid cell line Jurkat, further indicating their cell-type specificity (Figure  
169 2C). Notably, the RNA exhibited very low coding potential similar to that of other known lncRNAs  
170 (Figure S2E) as assessed by PhyloCSF software.<sup>34</sup> Additionally, no known protein domains were found  
171 (data not shown) using PFAM software.<sup>35</sup> Thus, we named the RNA transcript “long noncoding RNA

Trinh *et al.* main text and figure legends

172 originating from the URE of *PU.1*, or *LOUP*. qRT-PCR analyses of subcellular fractionations revealed

173 that *LOUP* resides in both the cytoplasm and the nucleoplasm compartments, and was particularly

174 enriched in the chromatin fraction (Figure S2F). The lncRNA is polyadenylated, being detected from

175 oligo(dT)-primed cDNAs (Figure 2B) and enriched in the polyA<sup>+</sup> RNA fraction (Figures 2C-D and S2G).

176 *LOUP* is low abundant lncRNA; the spliced form is expressed as ~40, 14, and 5 copies per cells in

177 U937, HL-60, and NB4, respectively (Figure 2E). The lncRNA was barely detectable as its premature

178 (non-spliced) form in total RNA as well as in the nuclear RNA fraction (Figures S2H-I). Altogether, these

179 findings established *LOUP* as a polyadenylated lncRNA that emanates from the URE and extends

180 toward the PrPr.

181

182 ***LOUP* is myeloid-specific lncRNA that is co-expressed with myeloid lineage gene *PU.1***

183 We sought to explore *LOUP* expression in normal tissues and cell types. By examining the *LOUP*

184 transcript profile in different human tissue types from the Illumina Body Map dataset, we noticed that

185 this lncRNA was barely detectable in most tissues but elevated in leukocytes (Figure 3A). Remarkably,

186 comparing with two of its closest neighbor genes, *PU.1* and *SLC39A13* (Figure S2D), the *LOUP*

187 expression pattern was similar to that of *PU.1* mRNA (Figures 3A-B) but not of *SLC39A13* (Figure

188 S3A). Additionally, *LOUP* transcript levels were not correlated with that of its interacting partner,

189 *RUNX1* (Figure S3B). To further delineate the relationship between *LOUP* and *PU.1* transcript levels

190 and lineage identity in individual blood cells, we employed single-cell RNA-seq analyses (scRNA-seq).

191 scRNA-seq data of human mononuclear cells isolated from peripheral blood (PBMC) and bone marrow

192 (BMMC) were retrieved from the 10x Genomic Project<sup>36</sup> and pooled together to maximize coverage of

193 hematopoietic cell lineages (Figure S3C). Notably, *LOUP* and *PU.1* were both enriched in the myeloid

194 cells, comprising of monocytes, macrophages and granulocytes (Figures S3D-E). Expectedly, *RUNX1*

195 was broadly expressed in myeloid cells as well as lymphoid cells (T, B, and Natural Killer (NK)) (Figure

196 S3F). By stratifying the mononuclear cell population into *LOUP*<sup>high</sup>/*PU.1*<sup>high</sup> and *LOUP*<sup>low</sup>/*PU.1*<sup>low</sup> groups

197 based on *LOUP* and *PU.1* expression levels (see methods for details), we noted that *LOUP*<sup>low</sup>/*PU.1*<sup>low</sup>

198 cells were associated with T, B, and NK cells. Remarkably, 99.3% of *LOUP*<sup>high</sup>/*PU.1*<sup>high</sup> cells were linked

199 to the myeloid identity (Figure 3C). Consistent with this observation, top biological processes

200 associated with expression of *LOUP* and *PU.1* were mono/macrophage and granulocyte functions

201 (Figure S3G and Table S2). We further examined expression patterns of *LOUP* and *PU.1* during

202 myeloid differentiation. qRT-PCR analyses of purified murine hematopoietic cell populations showed

203 low *Loup* levels in long-term hematopoietic stem cells (LT-HSC), short-term hematopoietic stem cells

204 (ST-HSC), common myeloid progenitors (CMP), and megakaryocyte-erythroid progenitors (MEP).

205 Remarkably, *Loup* expression was elevated in myeloid progenitor cells (granulocyte-macrophage

206 progenitors, GMP) and was highest in definitive myeloid cells (Figure 3D). A similar expression pattern



Trinh *et al.* main text and figure legends

207 was seen with *PU.1* (Figures 3E). Taken together, our data indicated that *LOUP* and *PU.1* transcript  
208 levels were associated with the myeloid identity, warranting further investigation regarding molecular  
209 relationship between *LOUP* and *PU.1* in myeloid cells.

210

### 211 ***LOUP* induces *PU.1* expression, promotes myeloid differentiation and inhibits cell growth**

212 To test our hypothesis that *LOUP* induces *PU.1* expression, we investigated the impact of loss-of-  
213 function of *LOUP* on *PU.1* expression. In order to deplete *LOUP*, we employed CRISPR/Cas9 genome-  
214 editing platform which introduces small insertion and deletion (indel) mutations in the *LOUP* gene via  
215 the non-homologous end-joining (NHEJ) DNA repair mechanism.<sup>37,38</sup> The macrophage cell line U937  
216 that expresses high levels of *LOUP* (Figure 2E) was stably transduced with lentiviruses carrying Cas9  
217 and *LOUP*-targeting or non-targeting sgRNAs. Double-positive mCherry (CAS9) and eGFP (sgRNA)  
218 cells were selected by fluorescence-activated cell sorting (FACS) (Figures 4A and S4A), and derived  
219 cell clones were analyzed by Sanger DNA sequencing and Inference of CRISPR edits (ICE) analysis.<sup>39</sup>  
220 Cell clones having indels at *LOUP*-targeting genomic locations (Figures S4B-D) displayed >80%  
221 depletion of *LOUP* RNA levels (Figure 4B, left panel). This depletion was paralleled by a significant  
222 reduction in *PU.1* mRNA levels (Figure 4B, right panel). In gain-of-function experiments, transient *in*  
223 *trans*-overexpression of *LOUP* in K562 cells resulted in significant induction of *PU.1* (Figure 4C).  
224 Remarkably, *in cis* locus-specific induction of endogenous *LOUP* via the CRISPR/dCas9-VP64  
225 activation system yielded a comparable increase in *PU.1* expression, despite producing lower *LOUP*  
226 transcripts than the ectopic *in trans*-expression (Figures 4D-E). Consistent with the important role of  
227 *PU.1* in myeloid differentiation,<sup>6,7,40,41</sup> *LOUP* depletion was associated with a reduction in expression of  
228 the myeloid marker CD11b (Figure 4F). Furthermore, *LOUP* depletion increases cell proliferation  
229 whereas enforced *LOUP* reduced cell number suggesting that *LOUP* inhibits cell growth (Figures 4G-  
230 H). Together, these results demonstrate that *LOUP* promotes myeloid differentiation and inhibits cell  
231 growth and that this lncRNA regulator exerts its inducing effect on *PU.1* expression primarily in *cis*.

232

### 233 ***LOUP* induces enhancer-promoter communication by interacting with chromatin at the *PU.1*** 234 **locus**

235 We have previously reported that the formation of a chromatin loop mediated by URE-PrPr  
236 interaction is crucial for *PU.1* induction.<sup>18,19</sup> Because *LOUP* arises from the URE and extends toward  
237 the PrPr, we reasoned that *LOUP* drives long-range transcription of *PU.1* by promoting URE-PrPr  
238 interaction. To elucidate this, we quantified interaction strengths of the URE with the PrPr and the  
239 surrounding area by chromosome conformation capture and Taqman qPCR (3C-qPCR) (Figure 5A).  
240 Consistent with previous reports,<sup>18,19</sup> we detected strong interaction between the URE and the PrPr, but  
241 not between the URE and other genomic regions, including the upstream *PU.1* promoter, intergenic

Trinh *et al.* main text and figure legends

242 sequences, and the *MYBPC3* gene body downstream of the *PU.1* locus. Interestingly, *LOUP* depletion  
243 caused a significant reduction in URE-PrPr communication (Figures 5B). To provide evidence  
244 supporting our prediction that *LOUP* recruits the URE to the PrPr by physically interacting with the two  
245 elements, we employed the Chromatin Isolation by RNA Purification (ChIRP) assay.<sup>42</sup> Biotinylated  
246 *LOUP*-tiling oligos were able to capture endogenous *LOUP* RNA in U937 cells (Figure 5C). Enrichment  
247 of the URE and the PrPr co-captured with *LOUP* RNA was observed in ChIRPed samples with *LOUP*-  
248 tiling probes but not LacZ-tiling controls, suggesting that *LOUP* occupies both the URE and the PrPr  
249 (Figure 5D). Taken together, our data indicate that by interacting and bringing to close proximity two  
250 regulatory elements, the URE and the PrPr, *LOUP* promotes the formation of a functional chromatin  
251 loop within the *PU.1* locus that is critical in inducing *PU.1* expression.

252

253 ***LOUP* binds the Runt domain of RUNX1 and coordinates recruitment of RUNX1 to the enhancer**  
254 **and the promoter**

255 We next sought to gain a deeper mechanistic understanding of how *LOUP* modulates the chromatin  
256 structure in a gene specific manner. Point mutations abolishing the RUNX binding sites in the URE are  
257 known to disrupt chromosomal interactions between the URE and the PrPr.<sup>15</sup> Additionally, we  
258 demonstrated that *LOUP* interacts with RUNX1 at the *PU.1* locus (Figure 1). Therefore, we asked  
259 whether *LOUP* mediates the URE-PrPr interaction by cooperating with RUNX1. In line with the previous  
260 finding in murine cells,<sup>15</sup> we observed RUNX1 occupancy at the URE in primary CD34<sup>+</sup> cells isolated  
261 from healthy donors and patients with AML. Importantly, we noticed a peak at the PrPr, indicating that  
262 RUNX1 also occupies the PrPr (Figure 6A). We further inspected the genomic region surrounding the  
263 PrPr and found a RUNX-DNA binding consensus motif at -220 bp relative to the *PU.1* mRNA  
264 transcription start site. To determine if this motif is functional, we performed biotinylated DNA pull-down  
265 (DNAP) assays. Wild-type probes, containing the RUNX consensus motifs embedded in the URE and  
266 the PrPr, efficiently captured endogenous RUNX1 from U937 nuclear extracts. In contrast, probes  
267 mutating the RUNX1 binding sequence, displayed drastic reductions in RUNX1 occupancy (Figures 6B  
268 and S5A). These results suggest that RUNX1 binds its DNA consensus motif at both the URE and the  
269 PrPr. RUNX1 is known to form homodimers to modulate transcription.<sup>43,44</sup> Thus, we reasoned that  
270 *LOUP* promotes looping formation by conferring occupancy of RUNX1 dimers concurrently at their  
271 binding motifs within the URE and the PrPr. Indeed, *LOUP* depletion reduced RUNX1 occupancy at  
272 both the URE and the PrPr (Figure 6C), indicating that *LOUP* promotes placement of RUNX1 dimers at  
273 the URE and the PrPr. By aligning *LOUP* sequence with itself using the Basic Local Alignment Search  
274 Tool (BLAST), we unexpectedly uncovered a highly repetitive region (RR) of 670 bp near the 3' end of  
275 *LOUP* (Figure S5B). Interestingly, by performing RNA pull-down assays (RNAP) assay, we noted that  
276 biotinylated *LOUP* RR was able to capture endogenous RUNX1 proteins in U937 nuclear extracts at a



Trinh *et al.* main text and figure legends

277 level that was comparable to biotinylated full-length *LOUP*, indicating that the RR contains RUNX1-  
278 binding region (Figure 6D). To further locate the binding region, we first computed potential interaction  
279 strength of putative elements within the RR to RUNX1 protein by using the catRAPID algorithm.<sup>45</sup> By  
280 doing so, we identified two ~100 bp candidate regions, termed region 1 (R1) and region 2 (R2) within,  
281 with high interaction scores (Figures S5C and 6E). RNAP analysis confirmed that R1 and R2 bind  
282 recombinant RUNX1 (Figure 6F). Additionally, recombinant Runt domain of RUNX1 was able to bind  
283 R1 and R2 (Figure 6G), suggesting that the Runt domain is responsible for *LOUP* binding. These data,  
284 together, suggests that *LOUP* binds RUNX1 and coordinates deposition of RUNX1 dimers to the URE  
285 and the PrPr.

286

287 **RUNX1-ETO down-regulates *LOUP* in t(8;21) AML by inhibiting histone H3 acetylation and**  
288 **reducing promoter accessibility**

289 We further examined how the oncogenic fusion protein RUNX1-ETO, derived from t(8;21)  
290 chromosomal translocation, affects the regulatory function of *LOUP*. By examining *LOUP* transcript  
291 profiles in an AML RNA-seq dataset downloaded from The Cancer Genome Atlas (TCGA), we noticed  
292 that *LOUP* RNA levels were significantly lower in t(8;21) AML patients as compared to AML patients  
293 with normal karyotype (Figure 7A, left panel). Consistent with our data demonstrating the *PU.1* is a  
294 downstream target of *LOUP*, *PU.1* levels were also lower in t(8;21) AML patients (Figure 7A, right  
295 panel). These finding were further confirmed by qRT-PCR using patient samples (Figure 7B). Thus, we  
296 reasoned that *LOUP* may act as an inhibitory target of RUNX1-ETO in t(8;21) AML. Indeed, depletion of  
297 RUNX1-ETO in t(8;21) AML cells Kasumi-1, resulted in a robust increase in *LOUP* transcript levels  
298 which was accompanied by a significant induction in *PU.1* mRNA (Figure 7C). RUNX1-ETO is capable  
299 of recruiting Nuclear Receptor Corepressor Histone Deacetylase Complex and associates with histone  
300 deacetylase activity.<sup>46-48</sup> To examine whether RUNX1-ETO inhibits *LOUP* transcription by affecting local  
301 histone acetylation, we analyzed histone acetylation and chromatin accessibility at the URE, where  
302 *LOUP* transcription is initiated, upon depletion of RUNX1-ETO.<sup>49</sup> As expected, knockdown of RUNX1-  
303 ETO reduces RUNX1-ETO occupancy at the URE (Figure 7D, top panel). Interestingly, depletion of  
304 RUNX1-ETO resulted in robust induction of the H3K9Ac histone acetylation mark that is associated  
305 with active promoters and Dnase I accessibility at the URE (Figure 7D, middle and bottom panels),  
306 indicating that RUNX1-ETO inhibits *LOUP* transcription by deacetylating and limiting its promoter  
307 accessibility.

308

309 In summary, we established *LOUP* as a myeloid-specific lncRNA that promotes myeloid  
310 differentiation and inhibits cell growth via cooperating with RUNX1 to induce *PU.1* expression, and that  
311 RUNX1-ETO disrupts the action of *LOUP* in t(8;21) AML. Thus, lncRNA *LOUP* acts as a regulatory hub

Trinh *et al.* main text and figure legends

312 delivering opposing effects from a broadly expressed transcription factor and its oncogenic derivative  
313 on long-range transcription of an important lineage gene (Figure 7E).

314

315 **DISCUSSION**

316 In this study, we discovered that RUNX1, which is expressed and exerts its regulatory roles in  
317 diverse cell types,<sup>50,51</sup> cooperates with a myeloid-specific lncRNA *LOUP* to induce long-range  
318 transcription of *PU.1*, and that RUNX1-ETO impairs *LOUP*-mediated *PU.1* induction by inhibiting *LOUP*  
319 expression in t(8;21) AML. Our study reported several important mechanistic findings. We reveal *LOUP*  
320 as a cellular RNA-interacting partner of RUNX1. We also demonstrate that *LOUP* recruits RUNX1 to  
321 respective RUNX1-binding motifs at both the URE and the PrPr, thereby promoting formation of the  
322 URE-PrPr chromatin loop at the *PU.1* locus. Additionally, we identify a repetitive region serving as the  
323 RUNX1-binding platform for *LOUP*. Furthermore, we show that *LOUP* is a inhibitory target of RUNX1-  
324 ETO, in t(8;21) AML. These findings provide important insight into how long-range transcription is  
325 induced in a gene-specific manner by ubiquitous transcription factors and how their chimeric derivative  
326 disrupt normal gene induction in leukemia.

327

328 Our findings that RUNX1, known to be crucial for the URE-PrPr interaction, occupies both the URE  
329 and the PrPr of the *PU.1* locus, provides a molecular understanding of locus-specific activation. We  
330 propose that, once the URE and the PrPr are brought into close proximity, RUNX1 molecules that are  
331 parts of separate URE- and PrPr-bound complexes might interact, resulting in the formation of the  
332 URE-PrPr (enhancer-promoter) transcriptional activation complex. In supporting of this mechanism,  
333 RUNX1 sites at enhancers and promoters have been shown to be critical for induction of *CSF2*  
334 (encoding GM-CSF), *CD34*, and *CEBPA* (encoding C/EBP $\alpha$ ),<sup>43,52-54</sup> suggesting that RUNX1 could also  
335 contribute to specific enhancer-promoter docking at these gene loci. In line with this notion, locus-  
336 specific enhancer-promoter interaction could be induced by artificially tethering transcription factor to  
337 promoter.<sup>55</sup> Our findings, therefore, support a model in which specific and on-target enhancer-promoter  
338 interactions are achieved by transcription factors, bound to specific motifs both at the enhancer and the  
339 target promoter, that are able to dimerize or multimerize, thereby helping to fuse enhancer and  
340 promoter transcriptional complexes together.

341

342 How chromatin-bound protein complexes at enhancers and target promoters are brought together in  
343 a highly specific manner is still poorly understood. Our findings offer several exciting avenues that  
344 might explain how locus-specific induction is accomplished. First, we demonstrated that *LOUP*  
345 modulates recruitment of RUNX1 to its binding motifs at both the URE and the PrPr, suggesting that  
346 *LOUP* might serve as an “RNA bridge”, bringing the separate RUNX1-containing-URE and -PrPr

Trinh *et al.* main text and figure legends

347 transcriptional complexes into proximity which finally fused into an URE-PrPr complex via RUNX1  
348 dimerization. Second, locus specificity might also be enhanced based on our finding that *LOUP* arises  
349 from the URE and acts *in cis* to modulate chromatin looping at the nearby *PU.1* locus. Accordingly,  
350 even when a small number of transcripts are being produced, local molecular concentration of *LOUP*  
351 could be enriched enough to profoundly influence rapid *PU.1* mRNA induction. Indeed, we found that  
352 *LOUP* is a low-abundance lncRNA but is enriched in the chromatin fraction. Third, we revealed that  
353 *LOUP* is expressed exclusively in myeloid cells. This could explain why RUNX1, which is expressed in  
354 diverse cell types, induces URE-PrPr interaction and *PU.1* expression specifically in myeloid cells.  
355 These findings, together, provide mechanistic understanding of gene-specific enhancer-promoter  
356 interaction and cell type-specific gene induction.

357  
358 Our findings also contribute to the growing body of knowledge with regard to molecular functions of  
359 lncRNAs. Indeed, among thousands of lncRNAs that are implicated to arise throughout the genome,  
360 only a few have been precisely mapped and molecularly characterized.<sup>23</sup> The herein described lncRNA  
361 *LOUP*, presenting as spliced and polyadenylated transcripts, binds the Runt domain of RUNX1 via a  
362 repetitive region. To our knowledge, *LOUP* is the first cellular RNA-interacting partner of RUNX1 being  
363 reported. Remarkably, we also discovered that *LOUP* is down-regulated by RUNX1-ETO. It also worth  
364 mentioning that a normal allele of *RUNX1* is retained alongside RUNX1-ETO fusion gene in t(8;21)  
365 AML cells<sup>56</sup> and that RUNX1-ETO is implicated to exert opposing effect by competing with RUNX1 for  
366 binding to protein partners and the same chromatin locations.<sup>49,57,58</sup> Collectively, our findings uncover a  
367 heretofore-unknown cross-regulation and molecular interactions of lncRNAs with transcription factors  
368 and their oncogenic derivatives, providing mechanistic understanding underlying their molecular  
369 functions.

370  
371 In summary, we identified lncRNA *LOUP* with several important molecular features, including cell-  
372 type specific expression and harboring a RUNX1-binding platform enabling *LOUP* to coordinate with  
373 RUNX1 to drive long-range transcription of *PU.1* in myeloid cells. *LOUP*, a downstream inhibited target  
374 of the oncogenic fusion protein RUNX1-ETO, is capable of inducing myeloid differentiation and  
375 inhibiting cell growth. Our finding raises the possibility that RNA regulators of transcription factor  
376 represent alternative targets for therapeutic development and provide a molecular mechanism  
377 explaining, at least in part, how ubiquitous transcription factors contribute to enhancer-promoter  
378 communication in both cell-type and gene-specific manner and how their chimeric derivatives disrupt  
379 this normal regulation in leukemia.

380  
381

Trinh *et al.* main text and figure legends

## 382 **ACKNOWLEDGEMENTS**

383 This work was supported by the following grants and awards. K01CA222707 to BQT; R50  
384 CA211304 to AKE; NCI R00 CA188595 and the Italian Association for Cancer Research (AIRC) awards  
385 to ADR; AIRC 5x1000 call "Metastatic disease: the key unmet need in oncology" to MYNERVA project,  
386 #21267 to MTV; NCI R35 CA197697, P01HL131477, the Singapore Ministry of Health's National  
387 Medical Research Council under its Singapore Translational Research (STaR) Investigator Award, and  
388 by the National Research Foundation Singapore and the Singapore Ministry of Education under its  
389 Research Centres of Excellence initiative to DGT. BQT thanks Linus Tsai and Touati Benoukraf for  
390 technical advice. The authors thank the Iannis Aifantis Lab for the generous gift of the sgRNA cloning  
391 vector, and Susumu Kobayashi, Robert Welner, To-Ha Thai, Constanze Bonnifer, and Li Chai for  
392 insightful comments. We also thank Junyan Zhang, Qiling Zhou and all the members of the Tenen  
393 Laboratory for technical assistance and helpful suggestions.

394

## 395 **AUTHORSHIP CONTRIBUTIONS**

396 DGT and BQT designed the study with contribution from AKE, PBS, MTV, PPP, and ADR. BQT,  
397 SU, AKE, SC, PZ, HZ, EL, FM, EK, EF, CG and ART performed experiments. BQT, VEA and GH  
398 analyzed ChIP-seq data; BQT and MB analyzed RIP-seq and scRNA-seq data; BQT and TMN  
399 analyzed bulk RNA-seq data and performed CRISPRa; RC and DET designed and performed RIP-seq  
400 experiment; LY, HY and BQT analyzed TCGA data, CW and BQT performed PhyloCSF analysis; BQT  
401 and SU drew schematics; BQT and DGT wrote the manuscript with input from authors, especially, AKE,  
402 EL, MB, TMN, PBS, MTV, PPP, and ADR. DGT supervised the project.

403

## 404 **DISCLOSURE OF CONFLICTS OF INTERESTS**

405 The authors declare no competing interests.

406

## 407 **REFERENCES**

- 408 1. Shivdasani RA, Orkin SH. The transcriptional control of hematopoiesis. *Blood*.  
409 1996;87(10):4025-4039.
- 410 2. Novershtern N, Subramanian A, Lawton LN, et al. Densely interconnected transcriptional  
411 circuits control cell states in human hematopoiesis. *Cell*. 2011;144(2):296-309.
- 412 3. Iwasaki H, Mizuno S, Arinobu Y, et al. The order of expression of transcription factors directs  
413 hierarchical specification of hematopoietic lineages. *Genes Dev*. 2006;20(21):3010-3021.
- 414 4. Tenen DG, Hromas R, Licht JD, Zhang DE. Transcription factors, normal myeloid development,  
415 and leukemia. *Blood*. 1997;90(2):489-519.

Trinh *et al.* main text and figure legends

- 416 5. Chen HM, Zhang P, Voso MT, et al. Neutrophils and monocytes express high levels of PU.1  
417 (Spi-1) but not Spi-B. *Blood*. 1995;85(10):2918-2928.
- 418 6. Rosenbauer F, Wagner K, Kutok JL, et al. Acute myeloid leukemia induced by graded reduction  
419 of a lineage-specific transcription factor, PU.1. *Nat Genet*. 2004;36(6):624-630.
- 420 7. Cook WD, McCaw BJ, Herring C, et al. PU.1 is a suppressor of myeloid leukemia, inactivated in  
421 mice by gene deletion and mutation of its DNA binding domain. *Blood*. 2004;104(12):3437-3444.
- 422 8. Huang G, Zhang P, Hirai H, et al. PU.1 is a major downstream target of AML1 (RUNX1) in adult  
423 mouse hematopoiesis. *Nat Genet*. 2008;40(1):51-60.
- 424 9. Chen CL, Broom DC, Liu Y, et al. Runx1 determines nociceptive sensory neuron phenotype and  
425 is required for thermal and neuropathic pain. *Neuron*. 2006;49(3):365-377.
- 426 10. Hoi CS, Lee SE, Lu SY, et al. Runx1 directly promotes proliferation of hair follicle stem cells and  
427 epithelial tumor formation in mouse skin. *Mol Cell Biol*. 2010;30(10):2518-2536.
- 428 11. Osorio KM, Lilja KC, Tumber T. Runx1 modulates adult hair follicle stem cell emergence and  
429 maintenance from distinct embryonic skin compartments. *J Cell Biol*. 2011;193(1):235-250.
- 430 12. North TE, de Bruijn MF, Stacy T, et al. Runx1 expression marks long-term repopulating  
431 hematopoietic stem cells in the midgestation mouse embryo. *Immunity*. 2002;16(5):661-672.
- 432 13. Miyoshi H, Shimizu K, Kozu T, Maseki N, Kaneko Y, Ohki M. t(8;21) breakpoints on  
433 chromosome 21 in acute myeloid leukemia are clustered within a limited region of a single gene, AML1.  
434 *Proc Natl Acad Sci U S A*. 1991;88(23):10431-10434.
- 435 14. Erickson P, Gao J, Chang KS, et al. Identification of breakpoints in t(8;21) acute myelogenous  
436 leukemia and isolation of a fusion transcript, AML1/ETO, with similarity to *Drosophila* segmentation  
437 gene, runt. *Blood*. 1992;80(7):1825-1831.
- 438 15. Staber PB, Zhang P, Ye M, et al. The Runx-PU.1 pathway preserves normal and AML/ETO9a  
439 leukemic stem cells. *Blood*. 2014;124(15):2391-2399.
- 440 16. Bulger M, Groudine M. Functional and mechanistic diversity of distal transcription enhancers.  
441 *Cell*. 2011;144(3):327-339.
- 442 17. Levine M. Transcriptional enhancers in animal development and evolution. *Curr Biol*.  
443 2010;20(17):R754-763.
- 444 18. Ebralidze AK, Guibal FC, Steidl U, et al. PU.1 expression is modulated by the balance of  
445 functional sense and antisense RNAs regulated by a shared cis-regulatory element. *Genes Dev*.  
446 2008;22(15):2085-2092.
- 447 19. Staber PB, Zhang P, Ye M, et al. Sustained PU.1 levels balance cell-cycle regulators to prevent  
448 exhaustion of adult hematopoietic stem cells. *Mol Cell*. 2013;49(5):934-946.
- 449 20. Li Y, Okuno Y, Zhang P, et al. Regulation of the PU.1 gene by distal elements. *Blood*.  
450 2001;98(10):2958-2965.



Trinh *et al.* main text and figure legends

- 451 21. Djebali S, Davis CA, Merkel A, et al. Landscape of transcription in human cells. *Nature*.  
452 2012;489(7414):101-108.
- 453 22. Ponting CP, Oliver PL, Reik W. Evolution and functions of long noncoding RNAs. *Cell*.  
454 2009;136(4):629-641.
- 455 23. Uszczynska-Ratajczak B, Lagarde J, Frankish A, Guigo R, Johnson R. Towards a complete  
456 map of the human long non-coding RNA transcriptome. *Nat Rev Genet*. 2018;19(9):535-548.
- 457 24. Mercer TR, Dinger ME, Mattick JS. Long non-coding RNAs: insights into functions. *Nat Rev*  
458 *Genet*. 2009;10(3):155-159.
- 459 25. Rinn JL, Chang HY. Genome regulation by long noncoding RNAs. *Annu Rev Biochem*.  
460 2012;81:145-166.
- 461 26. Di Ruscio A, Ebralidze AK, Benoukraf T, et al. DNMT1-interacting RNAs block gene-specific  
462 DNA methylation. *Nature*. 2013;503(7476):371-376.
- 463 27. Arber DA, Orazi A, Hasserjian R, et al. The 2016 revision to the World Health Organization  
464 classification of myeloid neoplasms and acute leukemia. *Blood*. 2016;127(20):2391-2405.
- 465 28. Hendrickson GD, Kelley DR, Tenen D, Bernstein B, Rinn JL. Widespread RNA binding by  
466 chromatin-associated proteins. *Genome Biol*. 2016;17:28.
- 467 29. Zhao J, Ohsumi TK, Kung JT, et al. Genome-wide identification of polycomb-associated RNAs  
468 by RIP-seq. *Mol Cell*. 2010;40(6):939-953.
- 469 30. Hunt SE, McLaren W, Gil L, et al. Ensembl variation resources. *Database (Oxford)*. 2018;2018.
- 470 31. Creyghton MP, Cheng AW, Welstead GG, et al. Histone H3K27ac separates active from poised  
471 enhancers and predicts developmental state. *Proc Natl Acad Sci U S A*. 2010;107(50):21931-21936.
- 472 32. Pekowska A, Benoukraf T, Zacarias-Cabeza J, et al. H3K4 tri-methylation provides an  
473 epigenetic signature of active enhancers. *EMBO J*. 2011;30(20):4198-4210.
- 474 33. Kodzius R, Kojima M, Nishiyori H, et al. CAGE: cap analysis of gene expression. *Nat Methods*.  
475 2006;3(3):211-222.
- 476 34. Lin MF, Jungreis I, Kellis M. PhyloCSF: a comparative genomics method to distinguish protein  
477 coding and non-coding regions. *Bioinformatics*. 2011;27(13):i275-282.
- 478 35. Finn RD, Coghill P, Eberhardt RY, et al. The Pfam protein families database: towards a more  
479 sustainable future. *Nucleic Acids Res*. 2016;44(D1):D279-285.
- 480 36. Zheng GX, Terry JM, Belgrader P, et al. Massively parallel digital transcriptional profiling of  
481 single cells. *Nat Commun*. 2017;8:14049.
- 482 37. Jinek M, Chylinski K, Fonfara I, Hauer M, Doudna JA, Charpentier E. A programmable dual-  
483 RNA-guided DNA endonuclease in adaptive bacterial immunity. *Science*. 2012;337(6096):816-821.
- 484 38. Jiang W, Bikard D, Cox D, Zhang F, Marraffini LA. RNA-guided editing of bacterial genomes  
485 using CRISPR-Cas systems. *Nat Biotechnol*. 2013;31(3):233-239.



Trinh *et al.* main text and figure legends

- 486 39. Hsiao TTM, Kelsey Waite, Joyce Yang, Reed Kelso, Kevin Holden, Rich Stoner. Inference of  
487 CRISPR Edits from Sanger Trace Data  
488 . *BioRxiv*. 2018.
- 489 40. Tenen DG. Disruption of differentiation in human cancer: AML shows the way. *Nat Rev Cancer*.  
490 2003;3(2):89-101.
- 491 41. Walter MJ, Park JS, Ries RE, et al. Reduced PU.1 expression causes myeloid progenitor  
492 expansion and increased leukemia penetrance in mice expressing PML-RARalpha. *Proc Natl Acad Sci*  
493 *U S A*. 2005;102(35):12513-12518.
- 494 42. Chu C, Quinn J, Chang HY. Chromatin isolation by RNA purification (ChIRP). *J Vis Exp*.  
495 2012(61).
- 496 43. Bowers SR, Calero-Nieto FJ, Valeaux S, Fernandez-Fuentes N, Cockerill PN. Runx1 binds as a  
497 dimeric complex to overlapping Runx1 sites within a palindromic element in the human GM-CSF  
498 enhancer. *Nucleic Acids Res*. 2010;38(18):6124-6134.
- 499 44. Li D, Sinha KK, Hay MA, Rinaldi CR, Sauntharajah Y, Nucifora G. RUNX1-RUNX1  
500 homodimerization modulates RUNX1 activity and function. *J Biol Chem*. 2007;282(18):13542-13551.
- 501 45. Bellucci M, Agostini F, Masin M, Tartaglia GG. Predicting protein associations with long  
502 noncoding RNAs. *Nat Methods*. 2011;8(6):444-445.
- 503 46. Gelmetti V, Zhang J, Fanelli M, Minucci S, Pelicci PG, Lazar MA. Aberrant recruitment of the  
504 nuclear receptor corepressor-histone deacetylase complex by the acute myeloid leukemia fusion  
505 partner ETO. *Mol Cell Biol*. 1998;18(12):7185-7191.
- 506 47. Lutterbach B, Westendorf JJ, Linggi B, et al. ETO, a target of t(8;21) in acute leukemia, interacts  
507 with the N-CoR and mSin3 corepressors. *Mol Cell Biol*. 1998;18(12):7176-7184.
- 508 48. Wang J, Hoshino T, Redner RL, Kajigaya S, Liu JM. ETO, fusion partner in t(8;21) acute  
509 myeloid leukemia, represses transcription by interaction with the human N-CoR/mSin3/HDAC1  
510 complex. *Proc Natl Acad Sci U S A*. 1998;95(18):10860-10865.
- 511 49. Ptasinska A, Assi SA, Mannari D, et al. Depletion of RUNX1/ETO in t(8;21) AML cells leads to  
512 genome-wide changes in chromatin structure and transcription factor binding. *Leukemia*.  
513 2012;26(8):1829-1841.
- 514 50. Hong D, Fritz AJ, Gordon JA, et al. RUNX1-dependent mechanisms in biological control and  
515 dysregulation in cancer. *J Cell Physiol*. 2019;234(6):8597-8609.
- 516 51. Deltcheva E, Nimmo R. RUNX transcription factors at the interface of stem cells and cancer.  
517 *Biochem J*. 2017;474(11):1755-1768.
- 518 52. Cockerill PN, Osborne CS, Bert AG, Grotto RJ. Regulation of GM-CSF gene transcription by  
519 core-binding factor. *Cell Growth Differ*. 1996;7(7):917-922.

Trinh *et al.* main text and figure legends

520 53. Guo H, Ma O, Speck NA, Friedman AD. Runx1 deletion or dominant inhibition reduces Cebpa  
521 transcription via conserved promoter and distal enhancer sites to favor monoopoiesis over  
522 granulopoiesis. *Blood*. 2012;119(19):4408-4418.

523 54. Levantini E, Lee S, Radomska HS, et al. RUNX1 regulates the CD34 gene in haematopoietic  
524 stem cells by mediating interactions with a distal regulatory element. *EMBO J*. 2011;30(19):4059-4070.

525 55. Deng W, Lee J, Wang H, et al. Controlling long-range genomic interactions at a native locus by  
526 targeted tethering of a looping factor. *Cell*. 2012;149(6):1233-1244.

527 56. Ben-Ami O, Friedman D, Leshkowitz D, et al. Addiction of t(8;21) and inv(16) acute myeloid  
528 leukemia to native RUNX1. *Cell Rep*. 2013;4(6):1131-1143.

529 57. Loke J, Assi SA, Imperato MR, et al. RUNX1-ETO and RUNX1-EVI1 Differentially Reprogram  
530 the Chromatin Landscape in t(8;21) and t(3;21) AML. *Cell Rep*. 2017;19(8):1654-1668.

531 58. Meyers S, Downing JR, Hiebert SW. Identification of AML-1 and the (8;21) translocation protein  
532 (AML-1/ETO) as sequence-specific DNA-binding proteins: the runt homology domain is required for  
533 DNA binding and protein-protein interactions. *Mol Cell Biol*. 1993;13(10):6336-6345.

534 59. Prange KHM, Mandoli A, Kuznetsova T, et al. MLL-AF9 and MLL-AF4 oncofusion proteins bind  
535 a distinct enhancer repertoire and target the RUNX1 program in 11q23 acute myeloid leukemia.  
536 *Oncogene*. 2017;36(23):3346-3356.

537

538 **FIGURE LEGENDS**

539 **Figure 1. Screening of gene loci exhibiting concurrent RUNX1 RNA and DNA interactions in**  
540 **THP-1 cells**

541 (A and B) Pie charts showing proportions of RUNX1 RIP-seq peaks and RUNX1 ChIP-seq peaks in  
542 coding and noncoding gene families. ChIP-seq data was from published source <sup>59</sup> under the Gene  
543 Expression Omnibus (GEO) accession number: GSE79899.

544 (C) Venn diagram intersecting RUNX1 RIP-seq, RUNX1 ChIP-seq gene lists and the myeloid gene list.

545 (D) Gene track view of the *PU.1* locus including the upstream region (highlighted in blue). Shown are  
546 RIP-seq tracks (Input, IgG and RUNX1) and RUNX1 ChIP-seq tracks (GSM2108052). Data was  
547 integrated in the UCSC genome browser.

548 (E) RUNX1 RIP-qPCR confirmation. Left panel: Location of three PCR amplicons (#1, #2, #3). Right  
549 panel: Enrichment of RNAs captured by anti-RUNX1 antibody and IgG control at three amplicons  
550 relative to input. Error bars indicate SD (n=3).

551 See also Figure S1 and Table S1.

552

553

Trinh *et al.* main text and figure legends

554 **Figure 2. Characterization of long noncoding RNA *LOUP***

555 (A) Gene track view of the genomic region encompassing the *PU.1* locus. RNA-seq tracks include THP-  
556 1, HL60, primary monocytes, and Jurkat. DNase-seq and ChIP-seq are overlay tracks of monocyte and  
557 myeloid cell lines. These data were processed from published data in GEO (see methods for details).  
558 CAGE-seq track was imported from the FANTOM5 project. #1, #2 and arrows point to locations of the  
559 RNA peaks.

560 (B) RT-PCR analysis of *LOUP*'s transcript features. First-strand cDNAs were generated from HL-60  
561 total RNA using a primer that does not anneal to the *PU.1* locus (Unrelated), Random hexamers,  
562 Oligo(dT), and strand-specific primers (Anti-sense and Sense).

563 (C) Northern blot analysis of *LOUP*. polyA<sup>-</sup> and polyA<sup>+</sup> RNA fractions were isolated from U937 and  
564 Jurkat cells. Top panel: schematic of the probe location spanning exon junction (E1 and E2a; see  
565 Figure S2D). Middle panel: Northern blot detection of *LOUP*'s major and minor transcripts. Lower panel:  
566 RNA gel demonstrating relative migration between 28S and 18S rRNAs stained with ethidium bromide.

567 (D) qRT-PCR analysis of *LOUP* levels in polyA<sup>-</sup> and polyA<sup>+</sup> RNA fractions isolated from HL-60 cells.  
568 Error bars indicate SD (n=3). \*\*\*p < 0.001.

569 (E) Calculation of *LOUP* transcript per cell by qRT-PCR. *LOUP* RNA standard curve was generated by  
570 *in vitro* transcription. Error bars indicate SD (n=3).

571 See also Figure S2.

572

573 **Figure 3. Expression profiles of *LOUP* and *PU.1* in normal tissues and cell lineages**

574 (A and B) Transcript profiles of *LOUP* and *PU.1* in human tissues. Shown are transcript counts from the  
575 Illumina Body Map RNA-seq data dataset (AEArrayExpress: E-MTAB-513). Error bars indicate SD  
576 (n=2).

577 (C) Proportion of cell lineages corresponding to *LOUP* and *PU.1* transcript levels. Myeloid: includes  
578 monocytes, macrophages and granulocytes; T<sub>CD4+</sub>: T helper cell; T<sub>CD8+</sub>: Cytotoxic T cell; T<sub>reg</sub>: Regulatory  
579 T cell; B: B lymphocyte; Plas: Plasma cell; NK: Natural killer cell; DC: Dendritic cell; Ery: Erythrocyte;  
580 Meg: Megakaryocyte.

581 (D and E) qRT-PCR analysis of *Loup* RNA and *PU.1* mRNA levels in murine hematopoietic stem,  
582 progenitor, and mature (myeloid) cell populations. LT-HSC: long-term hematopoietic stem cells;  
583 ST-HSC: short-term hematopoietic stem cells; CMP: common myeloid progenitors, MEP:  
584 megakaryocyte-erythroid progenitors; LMPP: lymphoid-primed multipotent progenitors;  
585 GMP: granulocyte-macrophage progenitors, myeloid cells (Mac1<sup>+</sup>Gr1<sup>+</sup>). Data are shown relative to LT-  
586 HSC. Error bars indicate SD (n=2).

587 See also Figure S3 and Table S2.

588

Trinh *et al.* main text and figure legends

589 **Figure 4. The effect of *LOUP* on *PU.1* expression, myeloid differentiation and cell growth**

590 (A) Schematic diagram of the upstream genomic region of the *PU.1* locus. Shown are sgRNA-binding  
591 sites (#D1 and #D2) for *LOUP* depletion using CRISPR/Cas9 technology.  
592 (B) qRT-PCR expression analysis for *LOUP* (left panel) and *PU.1* (right panel) in non-targeting (N) and  
593 *LOUP*-targeting (L) U937 cell clones. Data are shown relative to N1 control.  
594 (C) qRT-PCR expression analysis of *LOUP* RNA (left panel) and *PU.1* mRNA (right panel) in K562 cells  
595 transfected with *LOUP* cDNA or empty vector (EV) by electroporation.  
596 (D) Schematic diagram of the *LOUP* promoter region showing sgRNA-binding sites (#A1 and #A2) for  
597 *LOUP* induction. Distance from the TSS of *LOUP* is indicated in bp  
598 (E) qRT-PCR expression analysis of *LOUP* (left panel) and of *PU.1* (right panel) in K562 dCas9-VP64-  
599 stable cells infected with *LOUP*-targeting (#A1 and #A2) or non-targeting (control) sgRNAs.  
600 (F) FACS analysis of CD11b myeloid marker in U937 cell clones with *LOUP* homozygous indels (L2a  
601 and L2b) and controls (N1 and N2) using PACBLUE-conjugated CD11b antibody.  
602 (G) Edu incorporation was measured by flow cytometry for cell proliferation.  
603 (H) Trypan blue exclusion and manual cell counts for kinetics of cell growth (shControl v.s. shLOUP  
604 (#A1 and #A2).  
605 Error bars indicate SD (n=3). \* $p < 0.05$ ; \*\* $p < 0.01$ ; \*\*\* $p < 0.001$ , \*\*\*\* $p < 0.0001$ , n.s: not significant.  
606 See also Figure S4.

607

608 **Figure 5. 3C and ChIRP assays measuring the effect of *LOUP* on chromatin looping**

609 (A) Schematic diagram illustrating potential 3C interactions between the URE and genomic viewpoints  
610 surrounding the *PU.1* locus. Included are restriction recognition sites of A<sub>po</sub>I used in the assay. -8Kb,  
611 and -4Kb: distances from the PrPr in kilo bases. Int: intergenic.  
612 (B) 3C-qPCR TaqMan probe-based assay comparing crosslinking frequencies at chromatin viewpoints.  
613 The U937 cell clone L2a, carrying a *LOUP* homozygous indel that does not alter the recognition pattern  
614 of A<sub>po</sub>I (Figure S4D), was used to compare with non-targeting control (sgControl, N1). n.d.: not  
615 detectable.  
616 (C) qRT-PCR assay evaluating levels of *LOUP* RNA and control *GAPDH* captured by biotinylated  
617 *LOUP*-tiling and LacZ-tiling probes using ChIRP.  
618 (D) ChIRP assay assessing *LOUP* occupancies at the URE, the PrPr, and *ACTB* promoter. *LOUP*-tiling  
619 oligos were used to capture endogenous *LOUP* in U937 cells. LacZ-tiling oligos were used as negative  
620 control.  
621 Error bars indicate SD (n=3); \* $p < 0.05$ ; \*\*\*\* $p < 0.0001$ , n.s: not significant.

622

Trinh *et al.* main text and figure legends

623 **Figure 6. *LOUP* cooperates with RUNX1 to facilitate URE-PrPr interaction**

624 (A) Gene track view of the ~26 kb region encompassing the URE and the PrPr. Shown are RUNX1  
625 ChIP-seq tracks derived from CD34<sup>+</sup> cells from healthy donors (GSM1097884), an AML patient with  
626 FLT3-ITD AML (GSM1581788), and a non-t(8;21) AML patient (GSM722708) (top panel). The bottom  
627 panel is a schematic showing the corresponding genomic locations of *LOUP* and the 5' region of *PU.1*.  
628 (B) DNA pull-down assay showing binding of RUNX1 to the RUNX1-binding motifs at the URE and the  
629 PrPr. Proteins captured by biotinylated DNA oligos (wt: wildtype oligo containing RUNX1-binding motif,  
630 mt: oligo with mutated RUNX1-binding motif) in U937 nuclear lysate were detected by immunoblot.  
631 (C) ChIP-qPCR analysis of RUNX1 occupancy at the URE and the PrPr. *LOUP*-depleted U937  
632 (sg*LOUP*, L2a) and control (sgControl, N1) clones were used. PCR amplicons include the URE  
633 (contains known RUNX1-binding motif at the URE), PrPr (contains putative RUNX1-binding motif in the  
634 PrPr) and GENE DESERT (a genome region that is devoid of protein-coding genes). Error bars indicate  
635 SD (n=3).  
636 (D) RNA pull-down analysis of the RUNX1-*LOUP* interaction. Upper panel: Schematic diagram of  
637 *LOUP* showing relative position of the repetitive region RR. Arrows underneath the diagram illustrate  
638 direction and relative lengths of *in vitro*-transcribed and biotin-labeled *LOUP* fragments (Bead: no RNA  
639 control; EGFP: *EGFP* mRNA control; AS: full-length antisense control; S: full-length sense, and RR:  
640 repetitive region). Lower panel: *LOUP* fragments were incubated with U937 nuclear lysate. Retrieved  
641 proteins were identified by immunoblot.  
642 (E) Schematic diagram of the repetitive region RR showing predicted binding regions R1 and R2.  
643 (F and G) RNAP binding analysis of R1 and R2 with recombinant full-length and Runt domain of  
644 RUNX1. *In vitro*-transcribed and biotin-labeled RNAs include R1-AS (R1 antisense control); R1-S (R1  
645 sense); and R2-S (R2 sense). The vertical line demarcates where an unrelated lane was removed from  
646 the figure.

647 See also Figure S5.

648

649 **Figure 7. Effects of RUNX1-ETO on regulatory function of *LOUP***

650 (A) Transcript count for *LOUP* levels in AML patient samples (RNA-seq data was retrieved from TCGA  
651 portal. normal: normal karyotype n=87, t(8;21) n=7); Mann-Whitney U test: \*\*p<0.01, \*\*\*\*p<0.0001.  
652 (B) RT-qPCR analysis of AML patient samples. normal: normal karyotype (n=14), t(8;21) (n=7).  
653 Mann-Whitney U test: \*\*\*p<0.001.  
654 (C) qRT-PCR expression analysis of *RUNX1-ETO* (left panel), *LOUP* RNA (middle panel) and *PU.1*  
655 mRNA (right panel) in Kasumi-1 cells transfected with Renilla-targeting shRNA (shControl) and  
656 RUNX1-ETO targeting shRNA (shRUNX1-ETO). Error bars indicate SD (n=4), \*p<0.05, \*\*p<0.01,  
657 \*\*\*p<0.001.

Trinh *et al.* main text and figure legends

658 (D) Gene track view at the *LOUP* locus including the URE where *LOUP* transcription initiation is  
659 located. Shown are RUNX1-ETO CHIP-seq tracks (top panels), H3K9Ac CHIP-seq tracks (middle  
660 panels) and DNase-seq tracks of Kasumi-1 cells upon depletion of RUNX1-ETO. Cells were transfected  
661 with either nontargeting siRNA (siControl) or RUNX1-ETO-targeting siRNA. Data was processed from  
662 published dataset (GEO: GSE29222) and integrated in the UCSC genome browser.

663 (E) Model of how *LOUP* coordinates with RUNX1 to modulate chromatin looping resulting in PU.1  
664 induction, myeloid differentiation, and cell growth, and how RUNX1-ETO interferes with *LOUP*-  
665 mediated molecular functions.



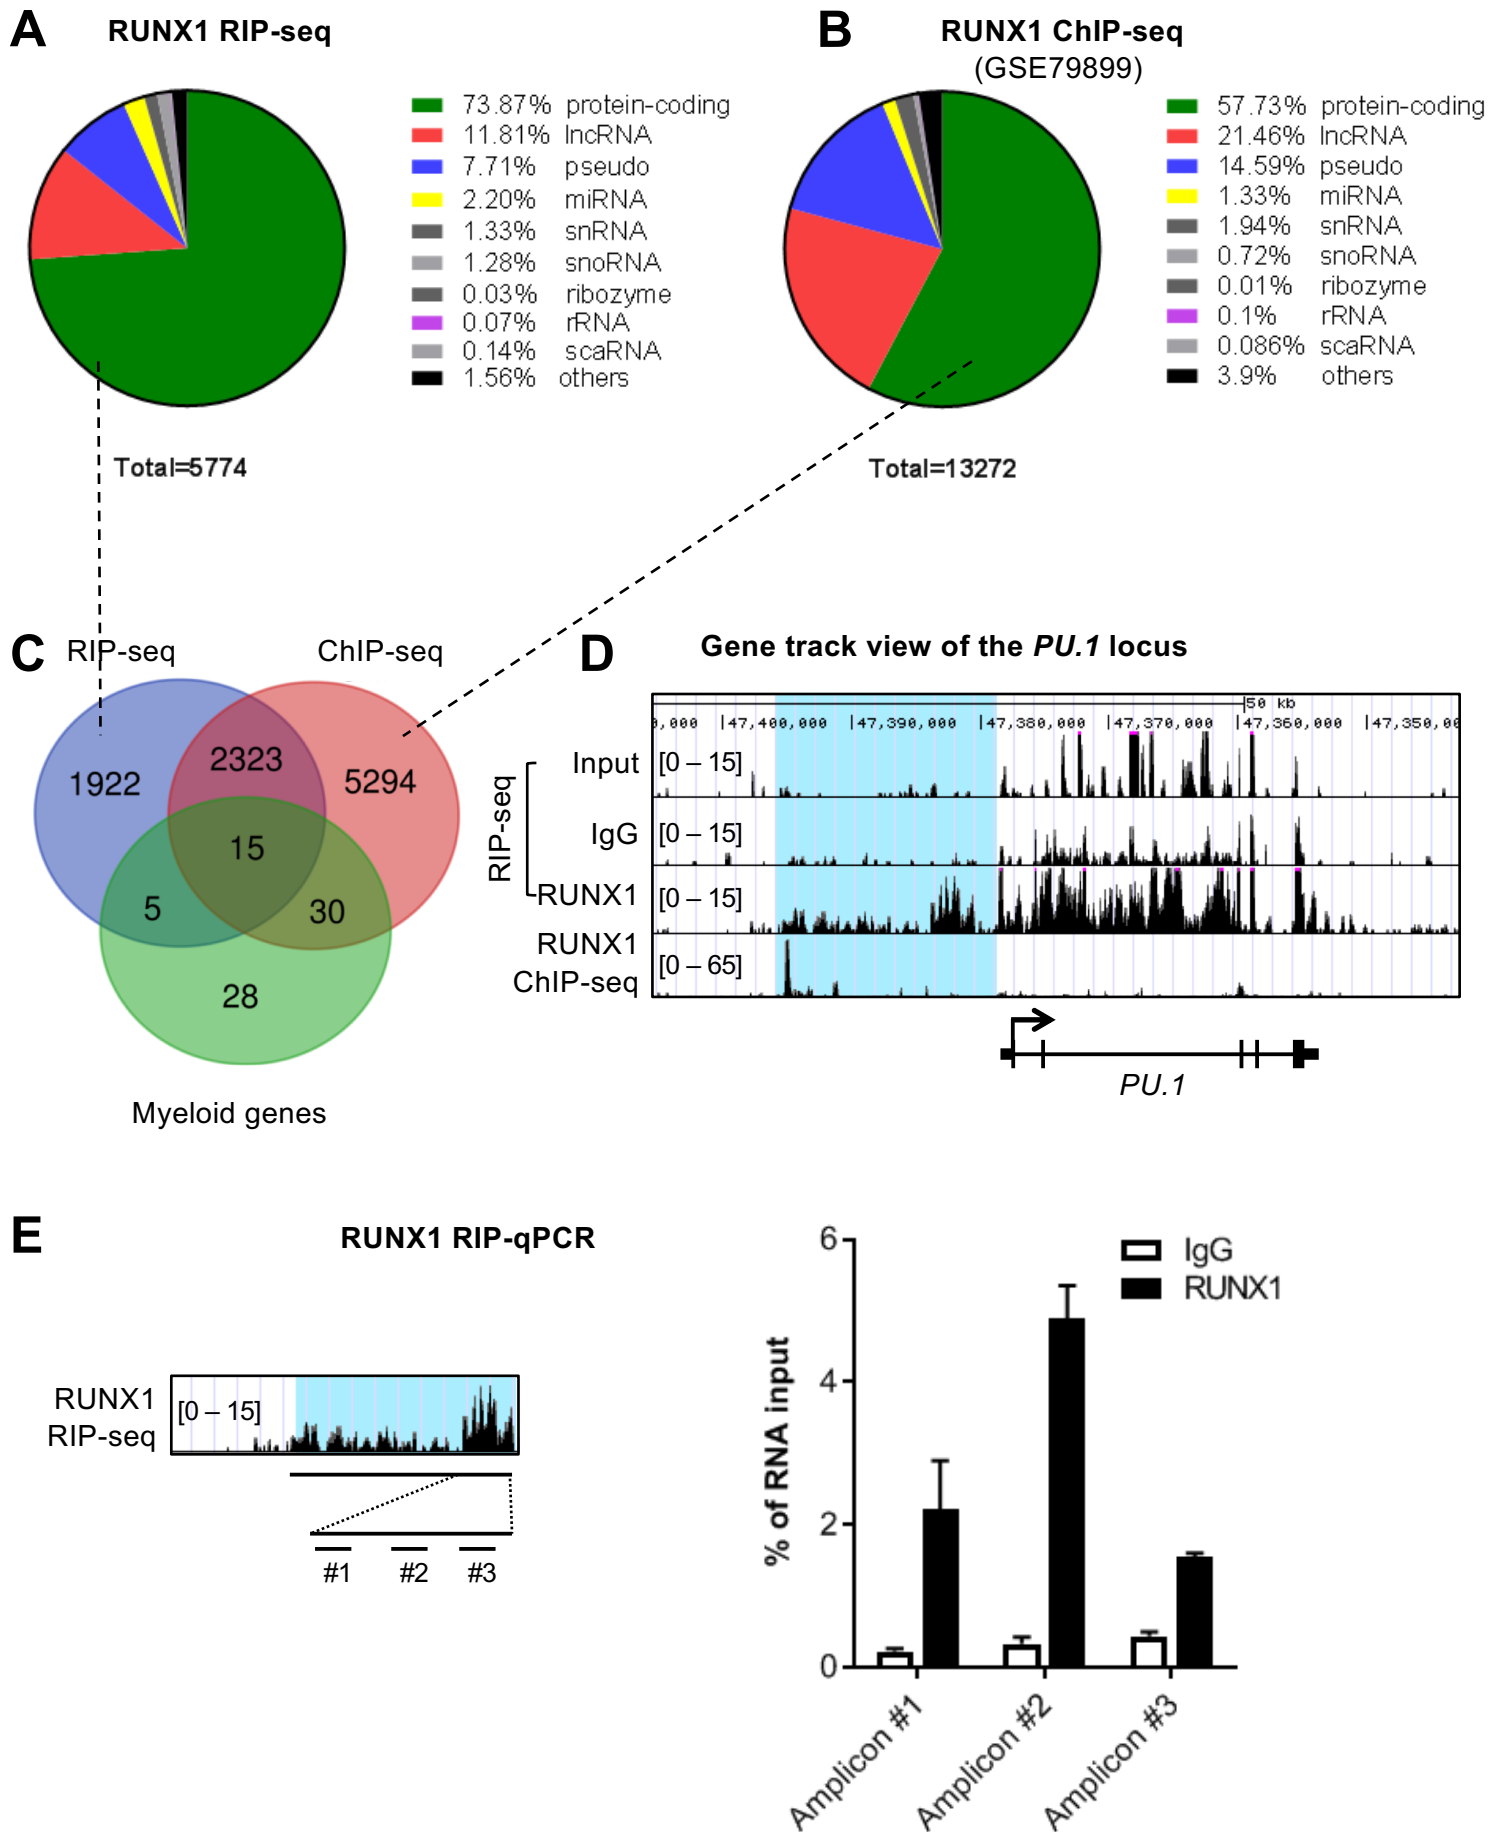

**Fig1**

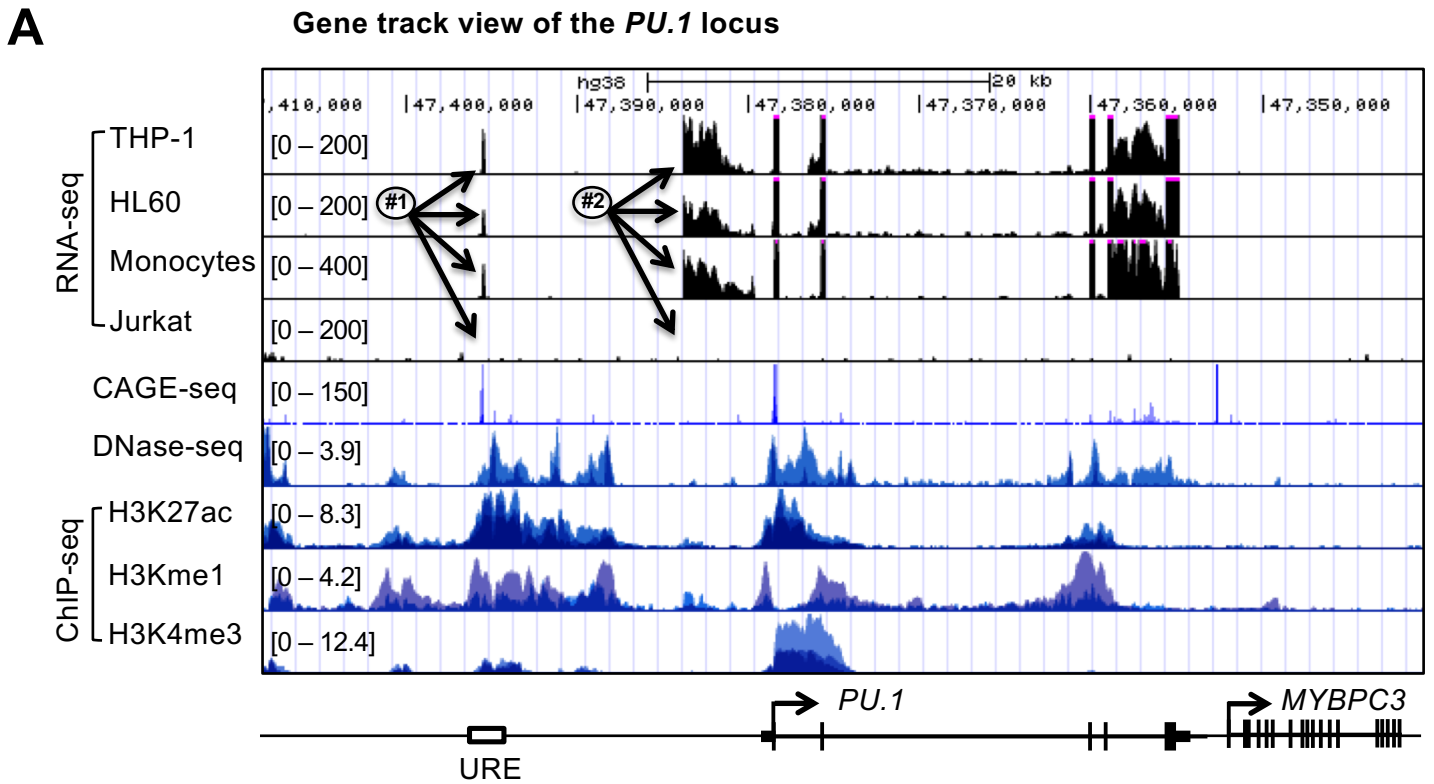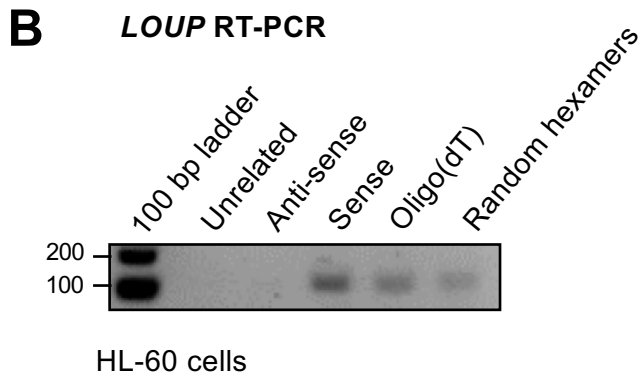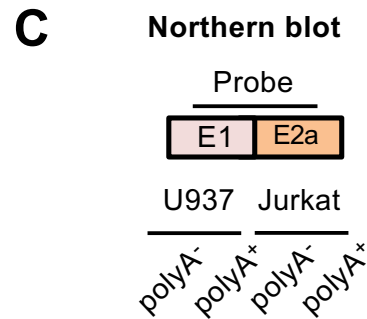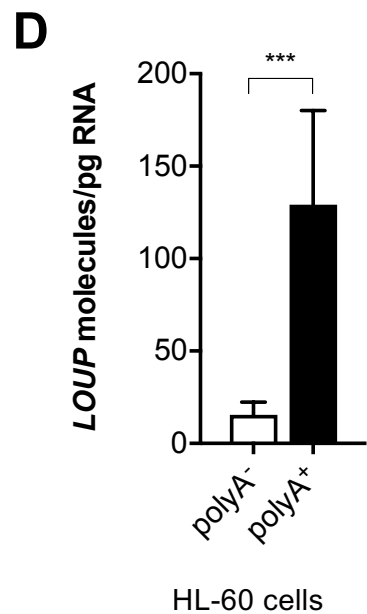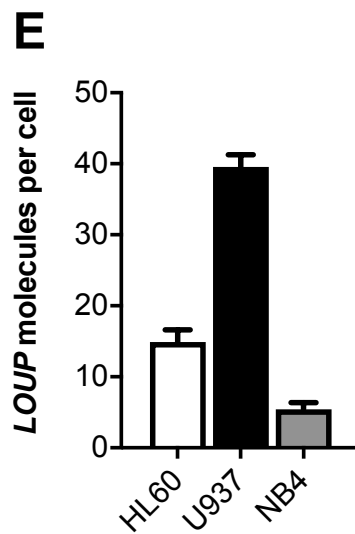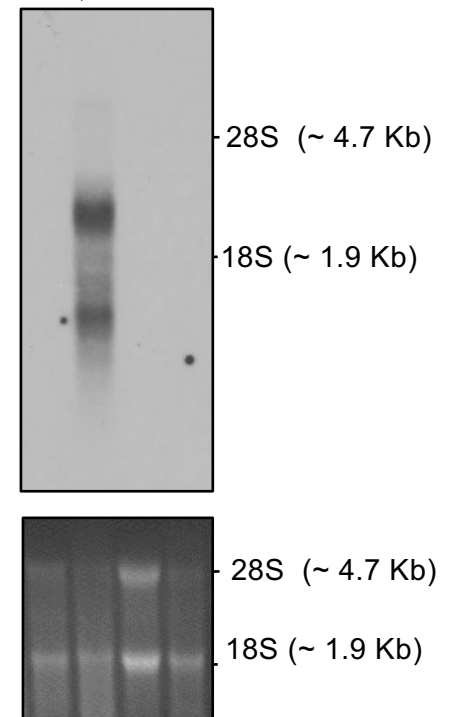

**Fig2**

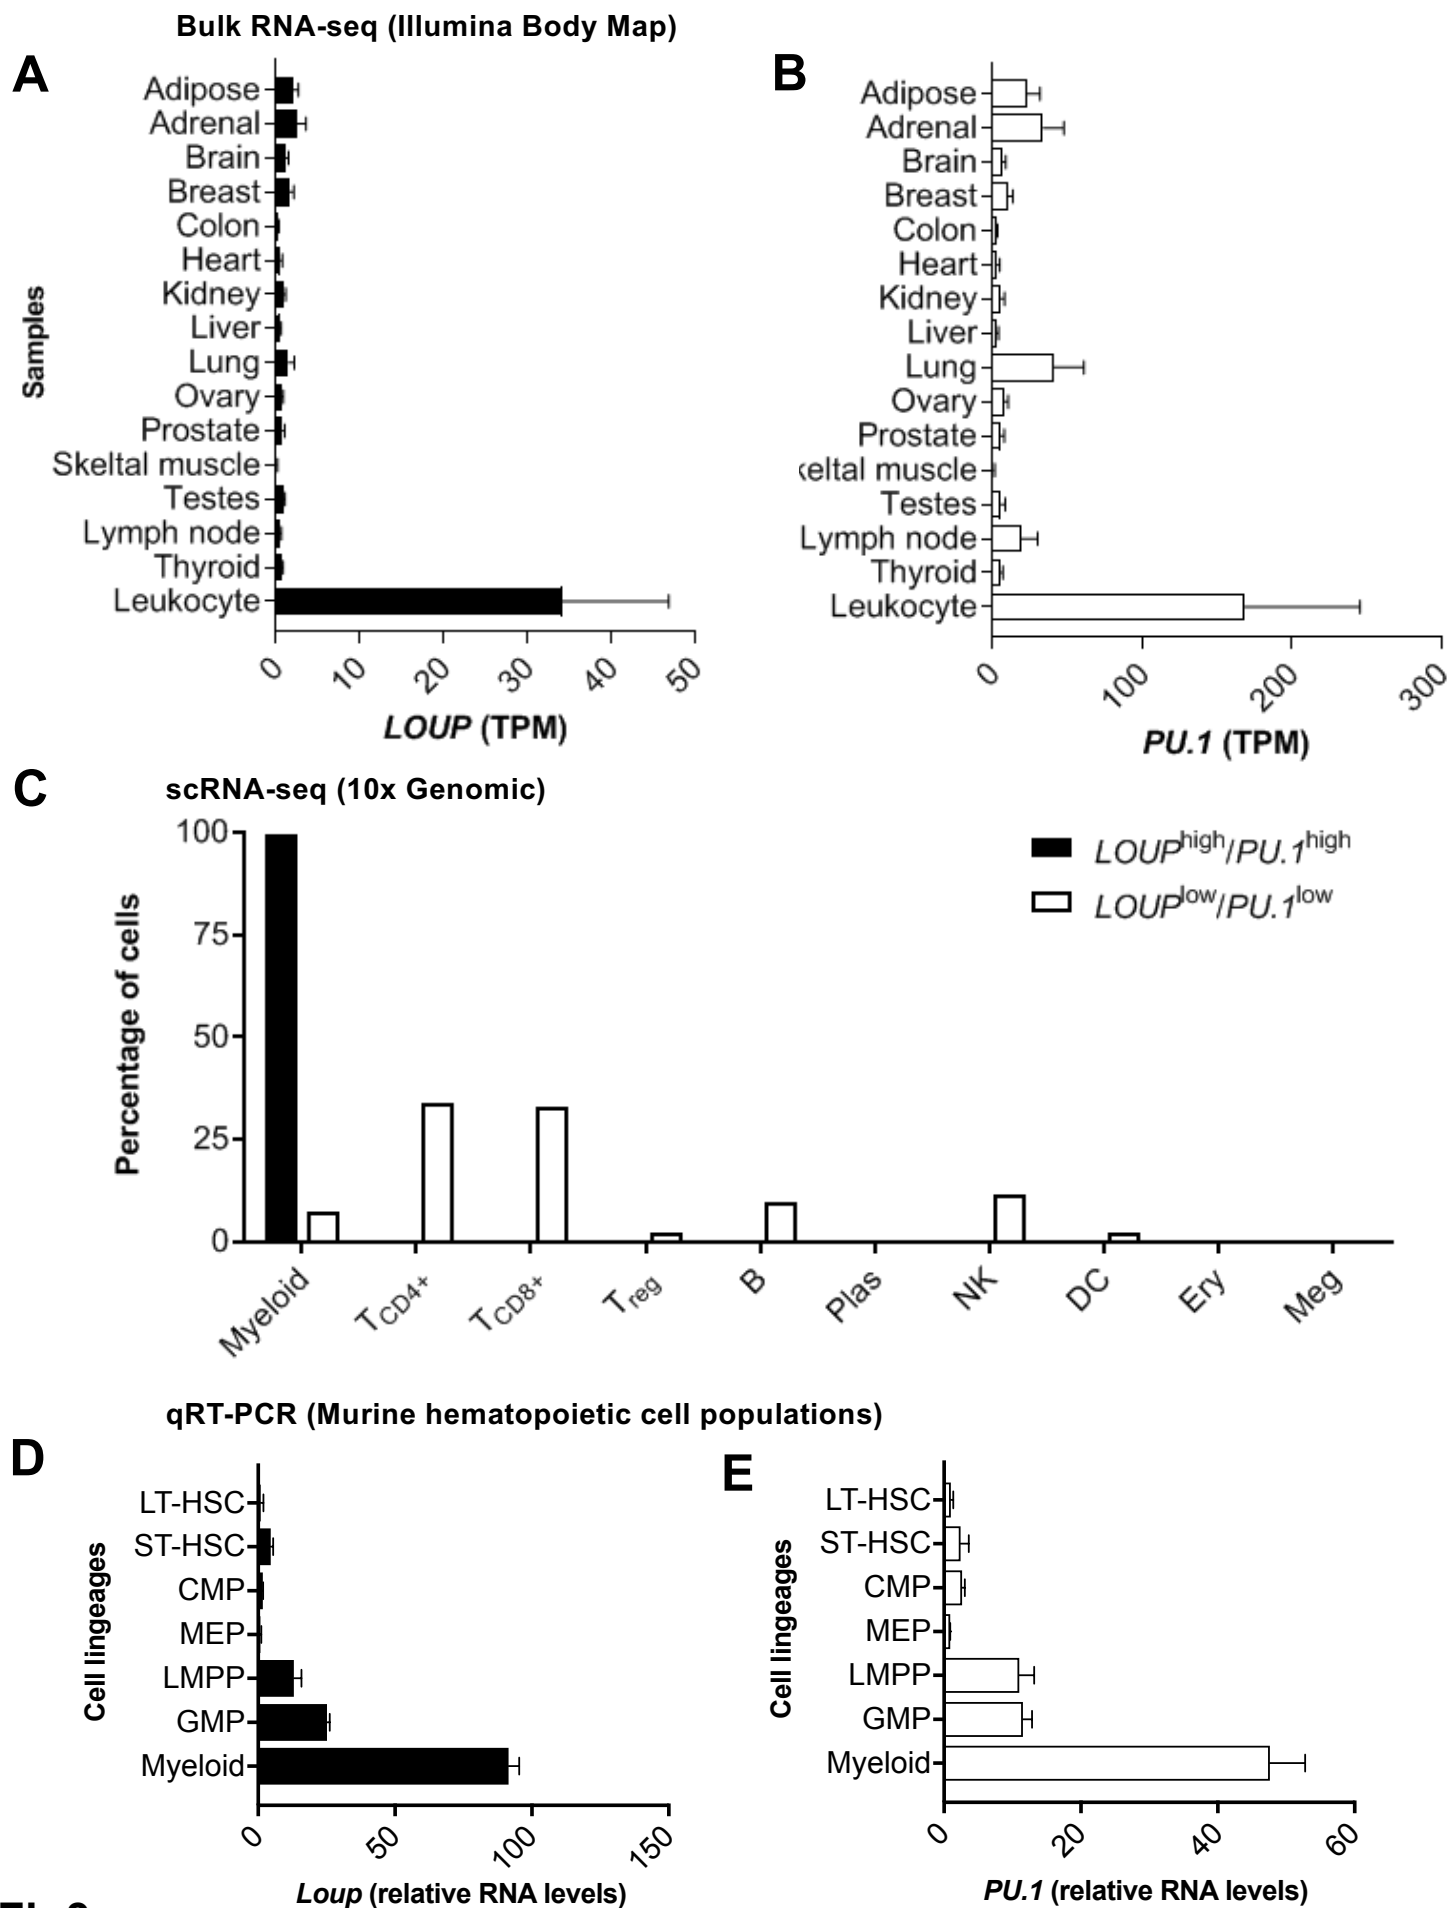

**Fig3**

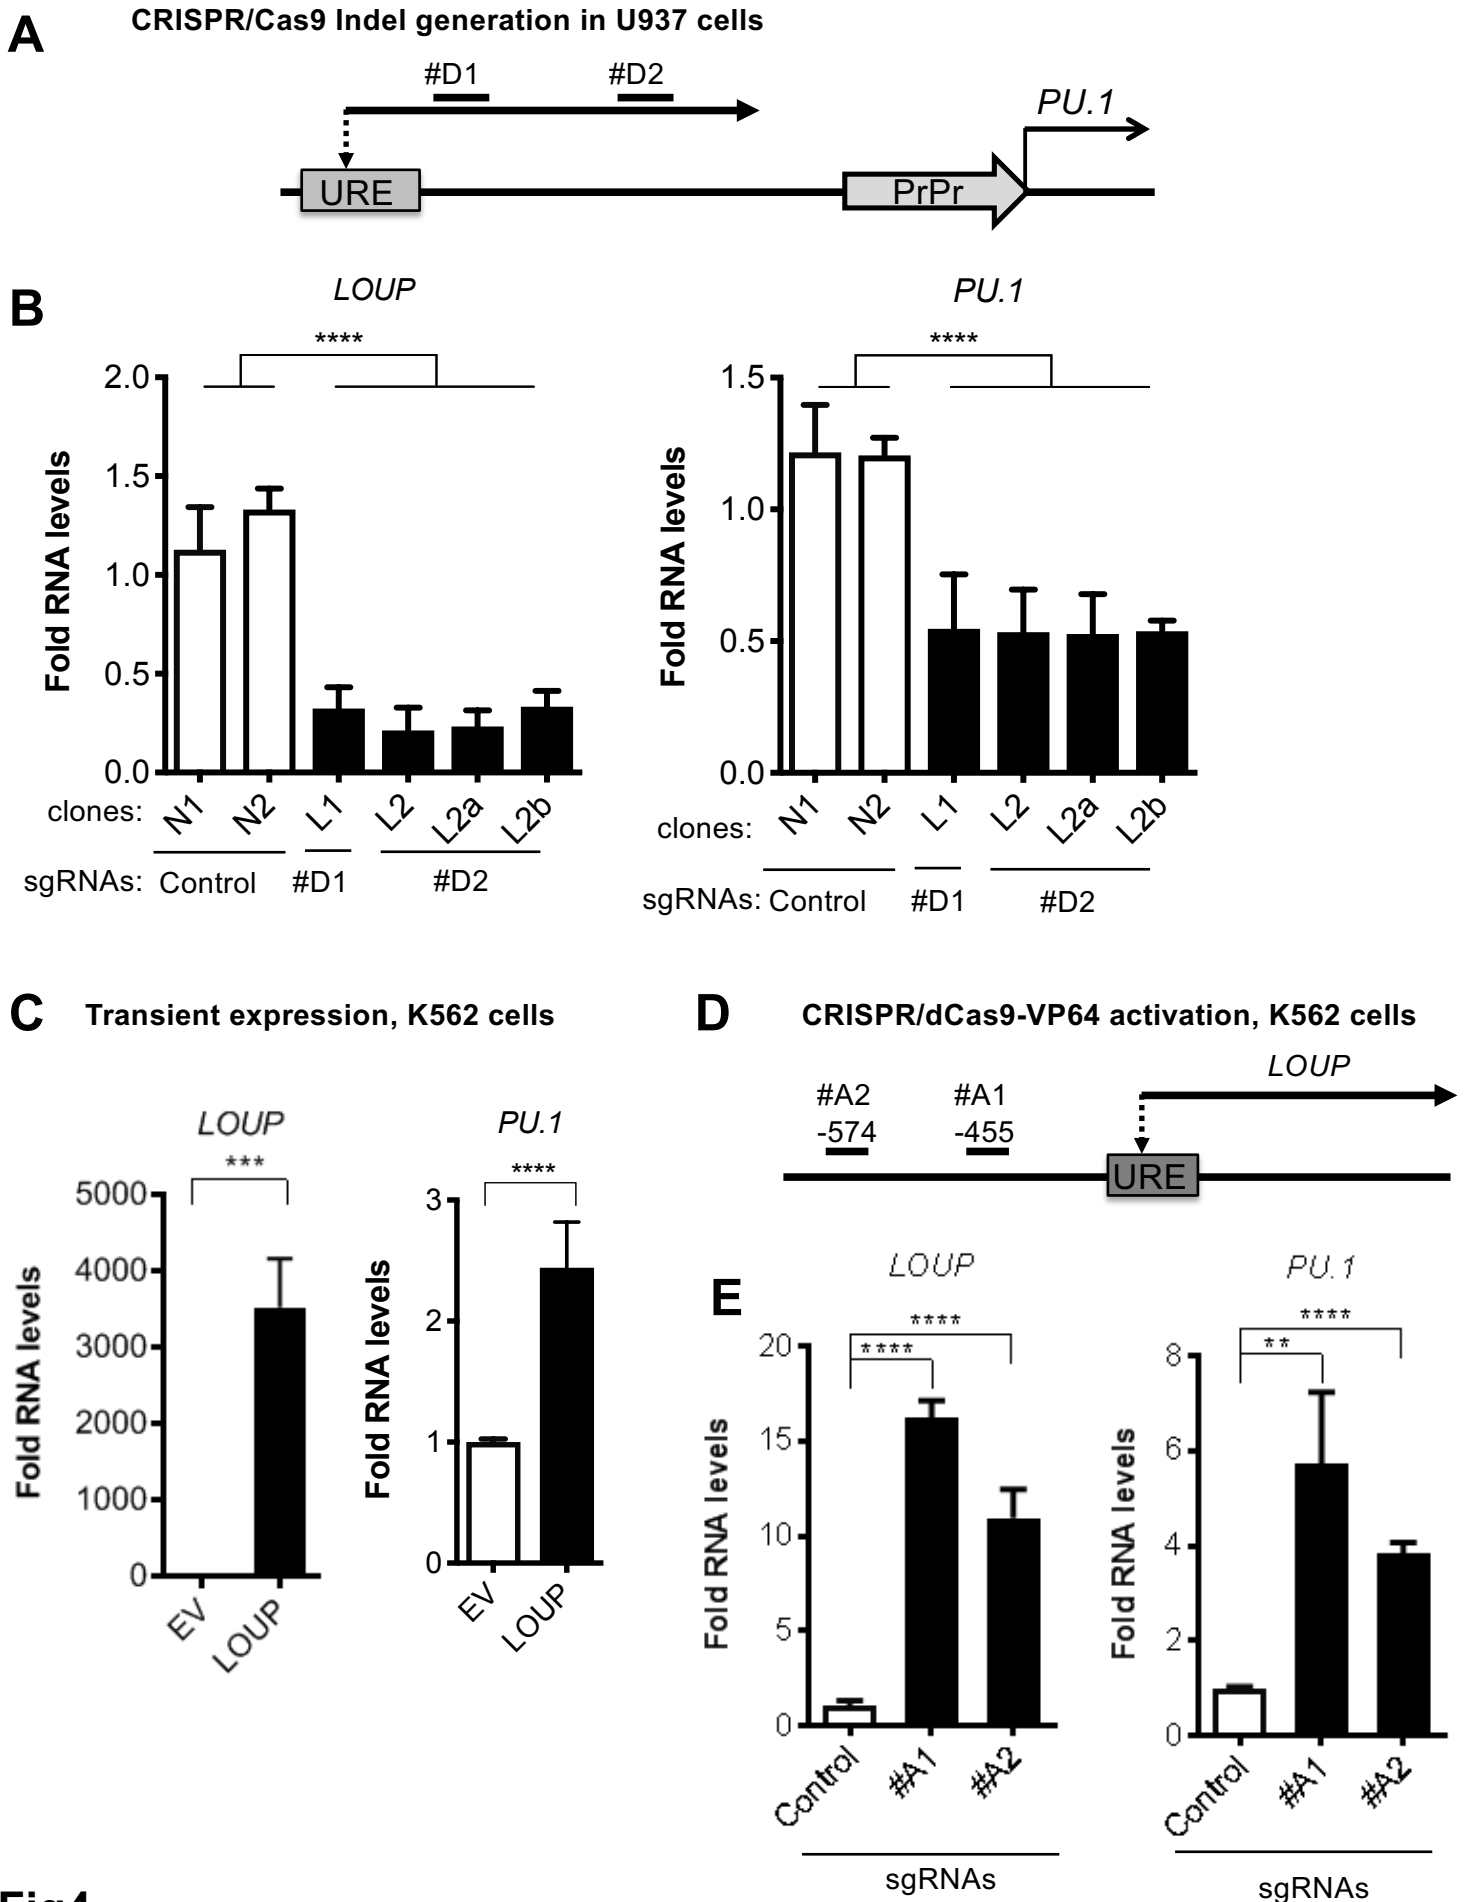

**Fig4**

### CRISPR/Cas9 Indel generation in U937 cells

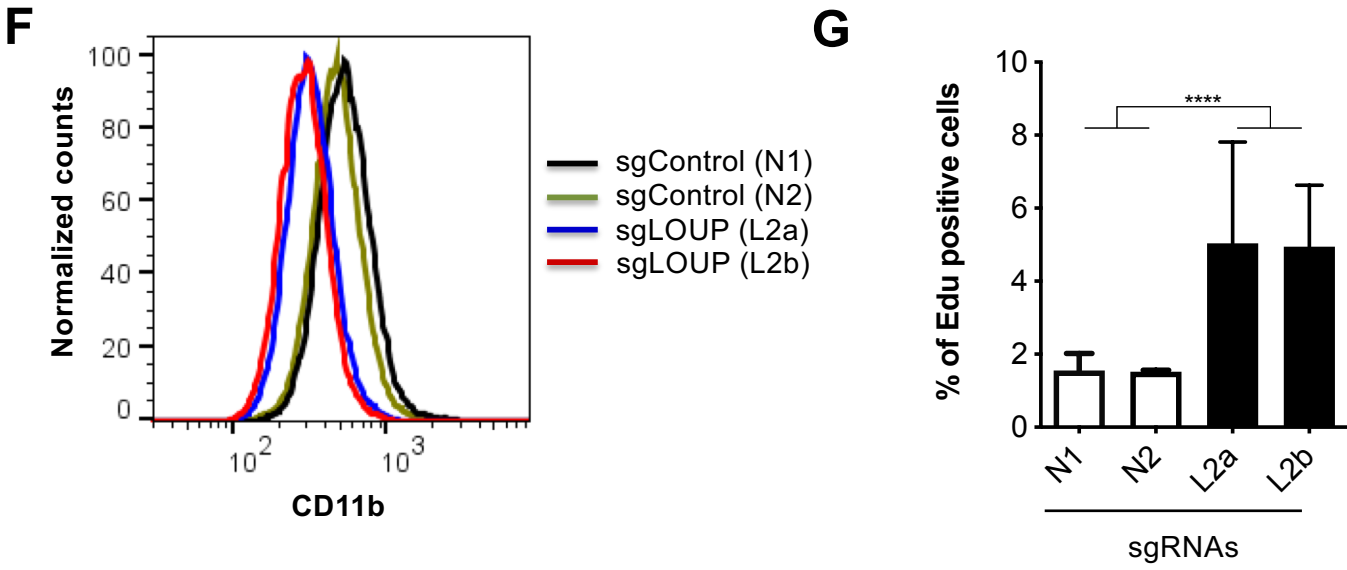

### H CRISPR/dCas9-VP64 activation, K562 cells

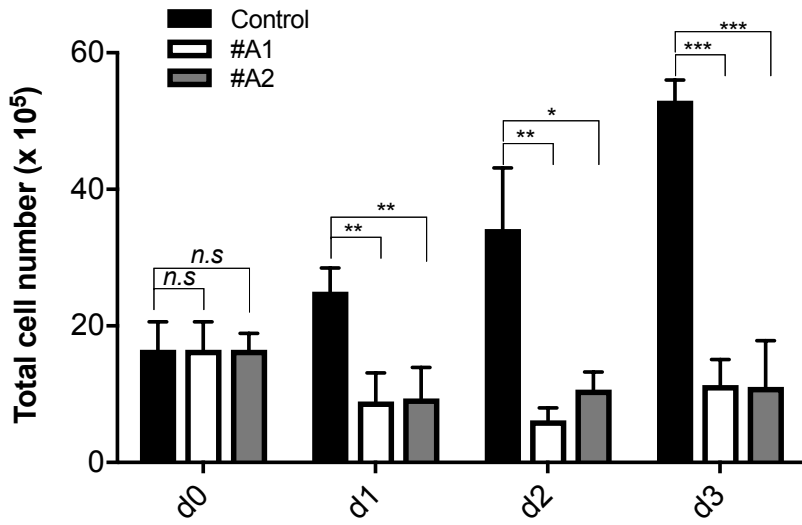

Fig4

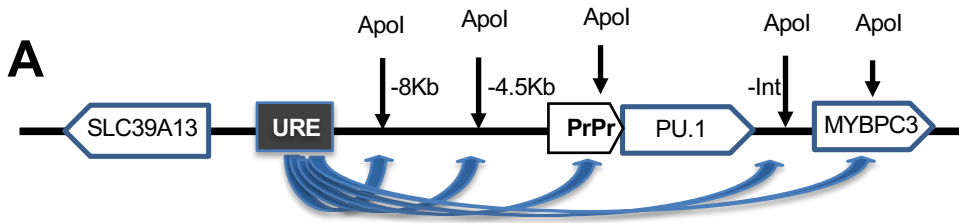

**B** 3C-qPCR TaqMan probe-based assay measuring URE interactions

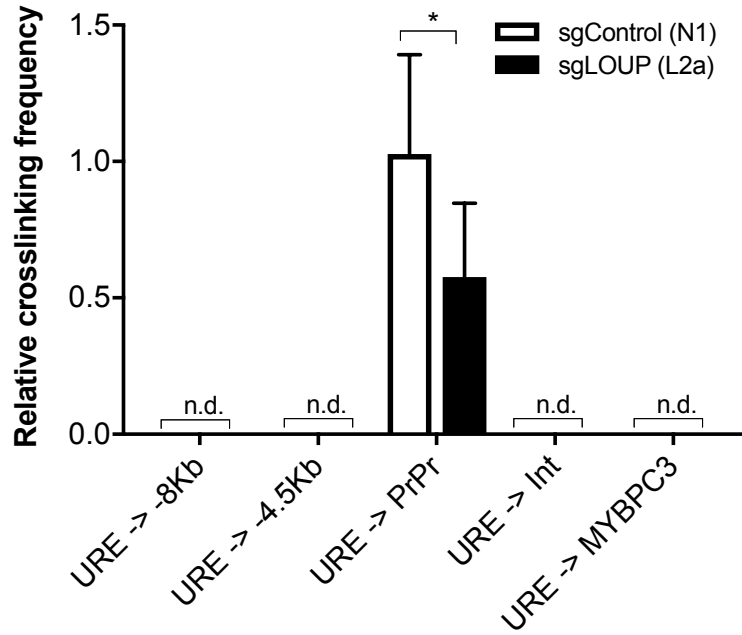

ChIRP assay of LOUP interactions with chromatin elements

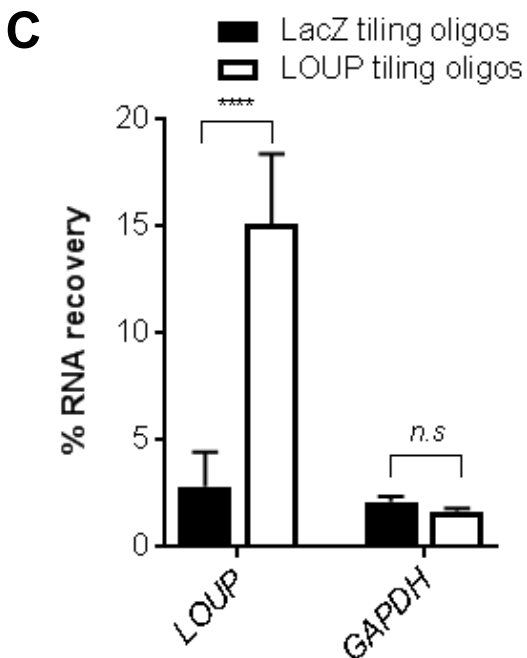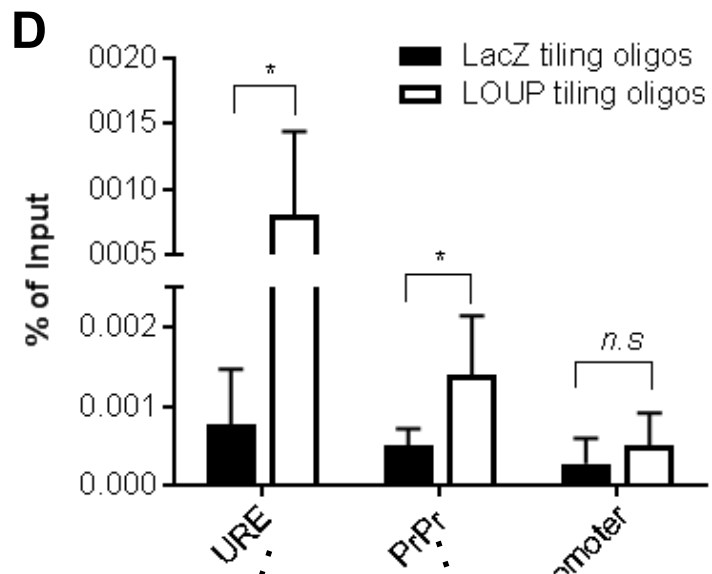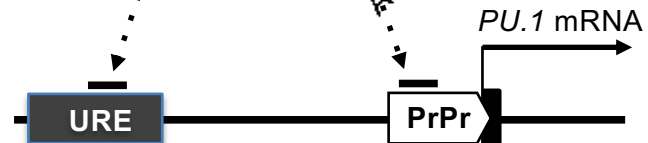

**Fig5**



### A Gene track view of RUNX1 ChIP-seq at *PU.1* locus

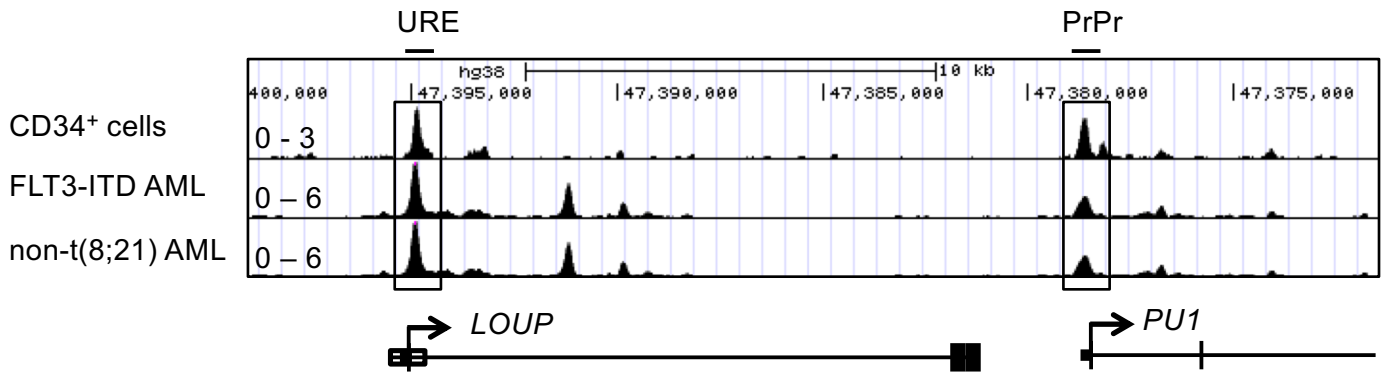

### B RUNX1-DNA binding (DNAP)

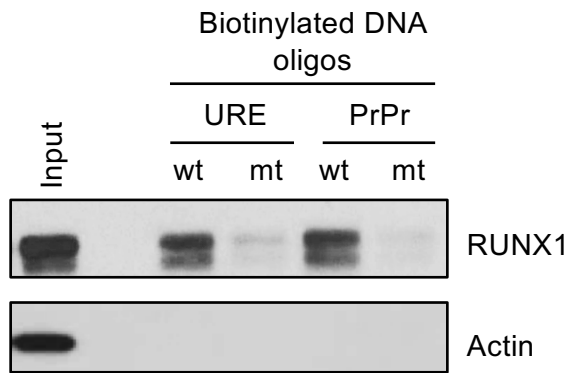

### C RUNX1 chromatin occupancy (ChIP-qPCR)

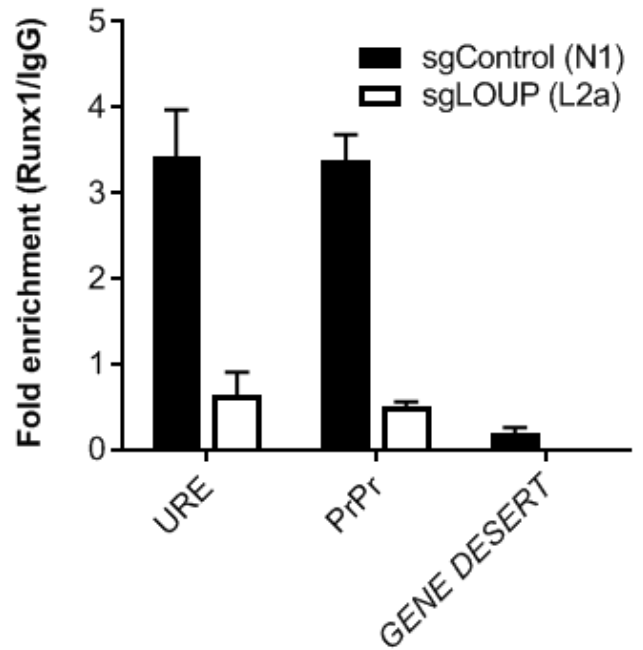

### D LOUP-RUNX1 binding (RNAP)

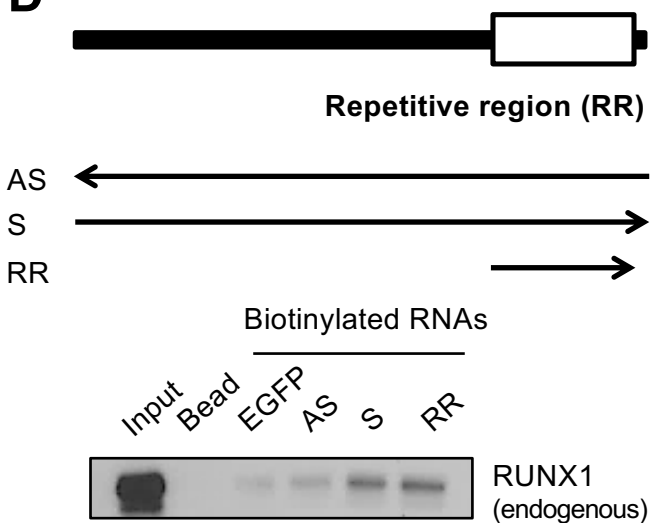

### E

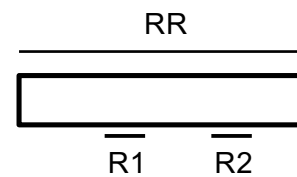

### F

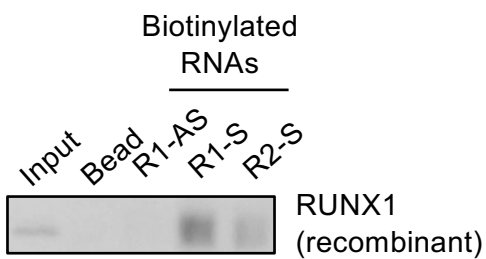

### G

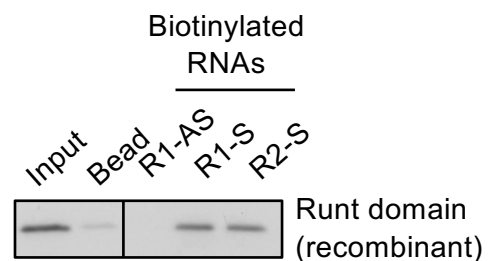

**Fig6**

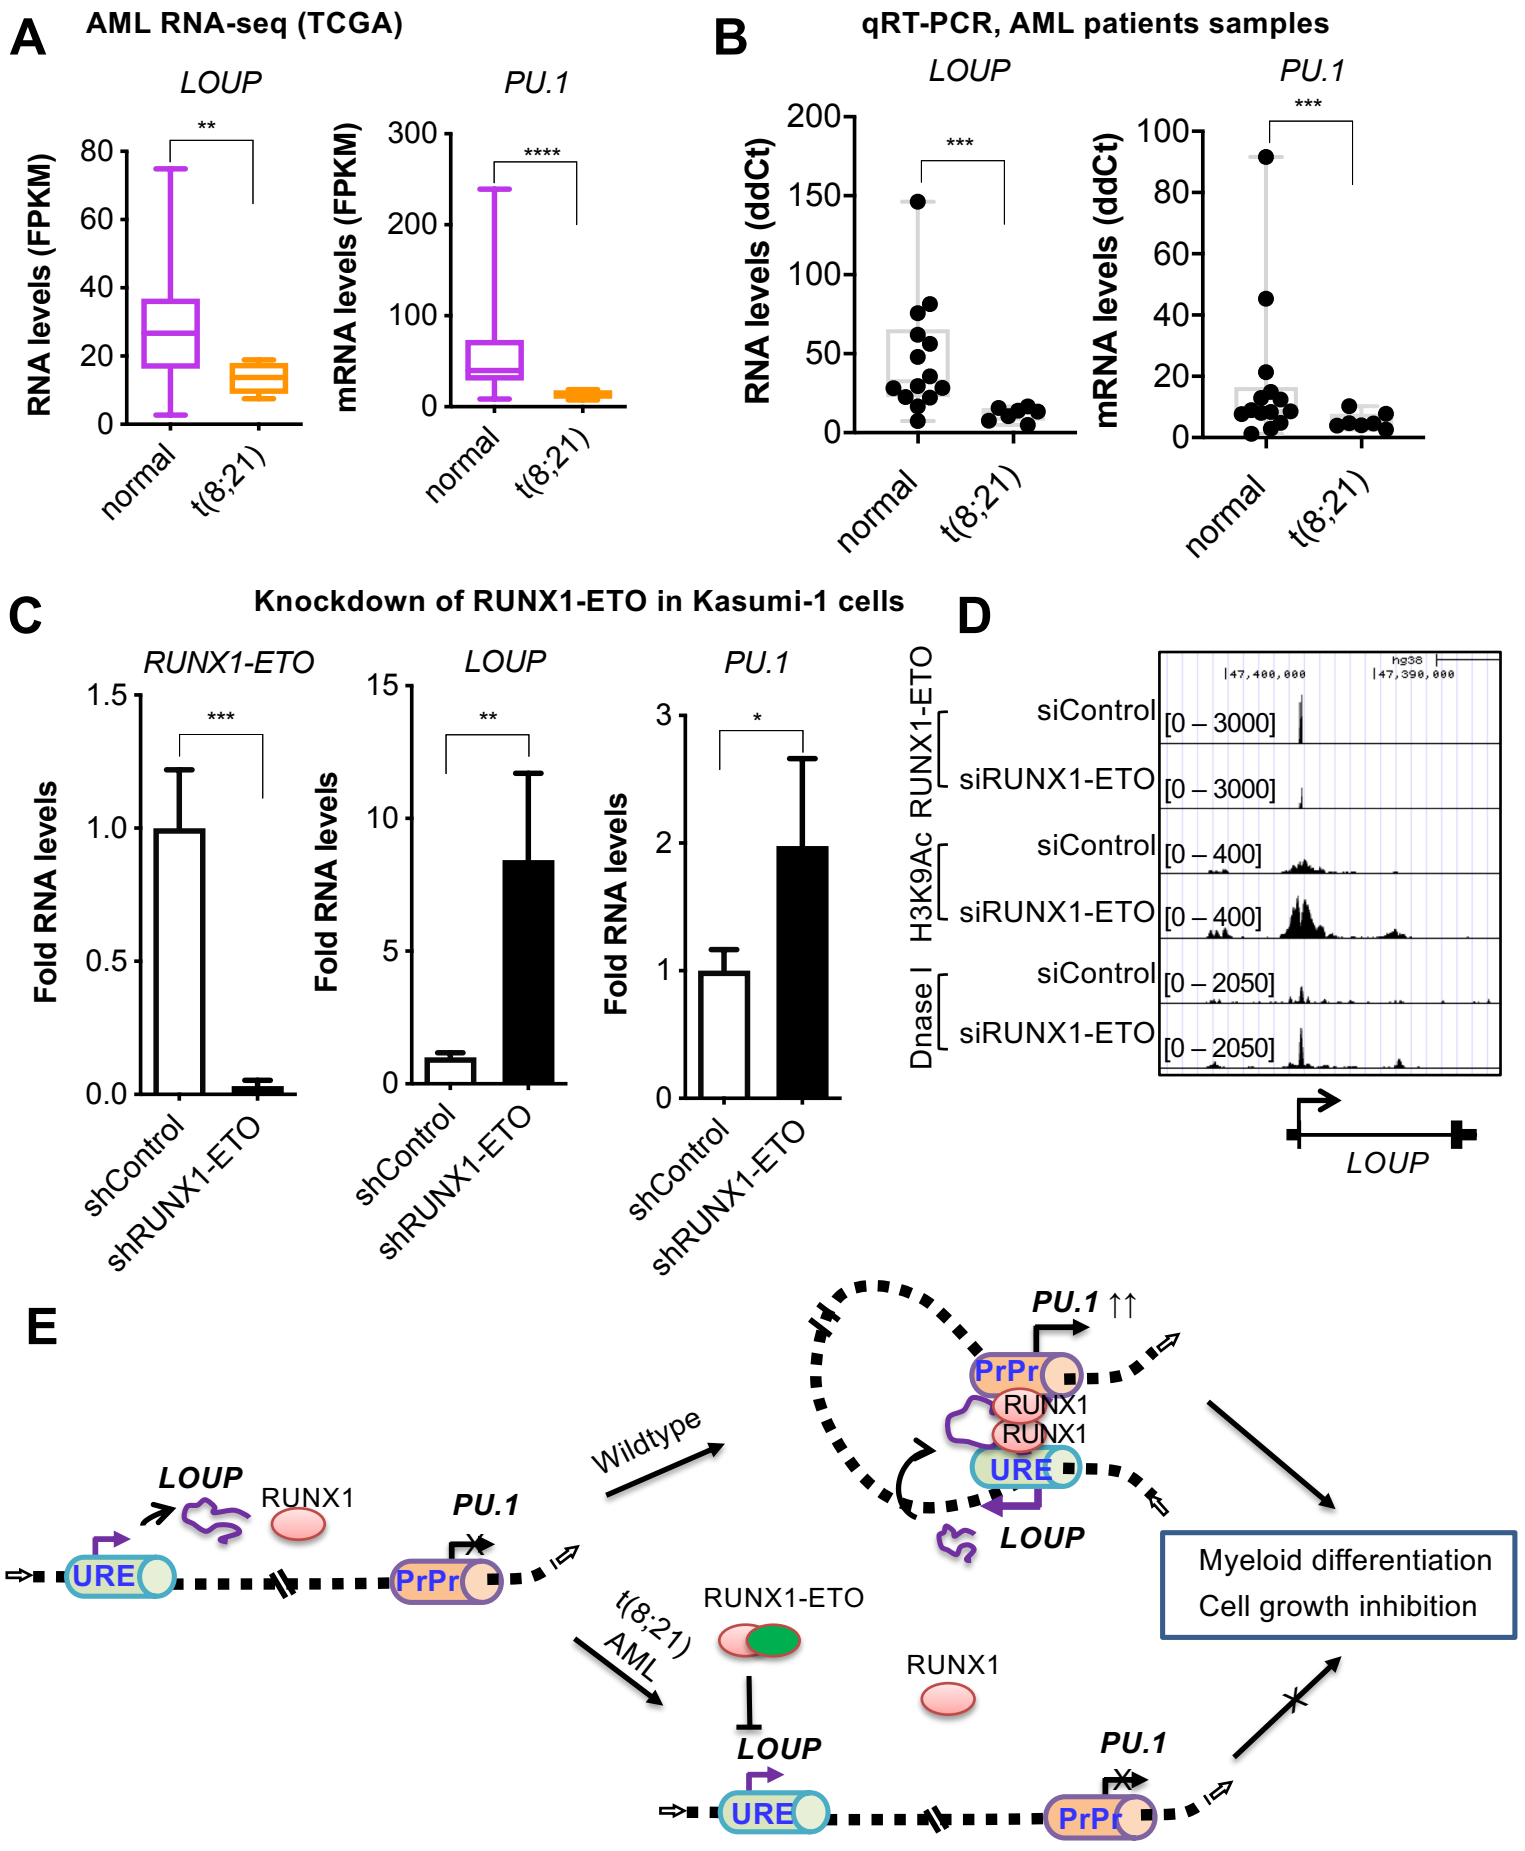

**Fig7**
